1           Can Rights-Based Conditional Cash Transfers Improve  
2                           Children's Nutrition at scale?  
3                           Evidence from India's Maternity Benefit Program

4                   Soumyajit Ray<sup>1</sup>

Suman Chakrabarti<sup>2,3</sup>

Sumantra Pal<sup>4</sup>

Phuong Hong Nguyen<sup>5</sup>

Samuel Scott<sup>6</sup>

Purnima Menon<sup>7</sup>

5

---

<sup>1</sup>International Food Policy Research Institute, New Delhi, India; [S.Ray@cgiar.org](mailto:S.Ray@cgiar.org)

<sup>2</sup> International Food Policy Research Institute, Washington DC; [S.Chakrabarti@cgiar.org](mailto:S.Chakrabarti@cgiar.org)

<sup>3</sup> Corresponding Author: International Food Policy Research Institute, NASC Complex, CG Block, Dev Prakash Shastri Road, Pusa, New Delhi 110012, India

<sup>4</sup> Economic Advisor, Government of India, New Delhi; [sumantrapal@gmail.com](mailto:sumantrapal@gmail.com)

<sup>5</sup> International Food Policy Research Institute, Washington DC; [P.H.Nguyen@cgiar.org](mailto:P.H.Nguyen@cgiar.org)

<sup>6</sup> International Food Policy Research Institute, Washington DC; [Samuel.Scott@cgiar.org](mailto:Samuel.Scott@cgiar.org)

<sup>7</sup> International Food Policy Research Institute, Washington DC; [P.Menon@cgiar.org](mailto:P.Menon@cgiar.org)

6

## Abstract

7 This study evaluates the impact of India's Pradhan Mantri Matru Vandana Yojana (PMMVY), a  
8 large-scale conditional cash transfer (CCT) program targeting women during their first birth, on  
9 child nutrition. Using National Family Health Survey (NFHS) data from 2005 to 2021, we assess  
10 changes in growth for 296,782 children under five years old before and after PMMVY  
11 implementation. To address potential biases, we employ a quasi-experimental approach with a  
12 Triple Difference analysis, comparing first- to second-born children of CCT and non-CCT  
13 mothers. We find that potential exposure to PMMVY is associated with improvements in weight-  
14 for-age and height-for-age z-scores. These effects likely operate through increased pregnancy  
15 registration, antenatal care, and immunizations. PMMVY is cost-effective, with a short-run  
16 benefit-cost ratio of 1.35. This study underscores the importance of CCT programs targeting  
17 mothers in enhancing child nutrition in low- and middle-income countries.

18 **Keywords:** conditional cash transfer, impact evaluation, child health, gender, India

19 **JEL classification:** I18, I38, I10, J16

## 20 **1 Introduction**

21 Low utilization of primary, preventive health care during pregnancy and early childhood is a key  
22 determinant of suboptimal maternal and child health outcomes, particularly in low- and middle-  
23 income countries (LMICs) (de Groot et al., 2017). Conditional Cash Transfer (CCT) programs  
24 incentivize low-income households to align their behaviour with national social objectives by  
25 directly providing cash when they meet specific conditions, such as ensuring children's school  
26 attendance or receive immunizations (Fernald et al., 2008). Some cash transfers are designed to  
27 increase the demand for health interventions and enhance uptake of primary health care (Manley  
28 et al., 2022). Currently, over 1.3 billion people in 100 countries have access to cash transfers (de  
29 Groot et al., 2017; Manley et al., 2022; Manley and Slavchevska, 2019; Owusu-Addo et al., 2018;  
30 Richterman et al., 2023). In various contexts, cash transfers have been associated with reductions  
31 in the risk of death among young children (Richterman et al., 2023), improved child health and  
32 nutrition outcomes among economically disadvantaged families (Galicia et al., 2016), and  
33 improved household diet quality (Manley et al., 2022). Viewing cash transfers as strategic  
34 investments to enhance nutritional status during a child's early years holds potential for long-term  
35 returns at individual and national levels. For India, investments made for a plausible set of  
36 nutritional interventions to reduce stunting are estimated to deliver a 34-fold return on investment  
37 in economic benefits (Hoddinott et al., 2013). The potential returns in India are particularly high  
38 given the large number of individuals who are positioned to benefit from such programs.

39 In India, from 2005 to 2016, the Janani Suraksha Yojana (JSY) was the sole nationwide perinatal  
40 CCT program, providing coverage to over 10 million pregnant women (**Table S1**) (Carvalho et  
41 al., 2014; Lim et al., 2010). However, in January 2017, the Indian Government introduced the

42 Pradhan Mantri Matru Vandana Yojana (PMMVY) (which roughly translates to Prime Minister's  
43 Maternity Benefit Program in English), another CCT program specifically catering to pregnant  
44 and lactating women in all districts throughout the country (Government of India, 2022). Every  
45 Indian pregnant and lactating woman is entitled to a maternity benefit of a minimum 6,000 Indian  
46 rupees (INR) under the National Food Security Act (NFSA) 2013. By capitalizing on the extensive  
47 reach and scope of the JSY, the PMMVY is potentially the world's largest perinatal CCT program  
48 in terms of number of individuals reached (Lim et al., 2010). As on March 2024, PMMVY program  
49 has enrolled 38.3 million beneficiaries and has made cash transfers to 33.8 million beneficiaries.

50 While JSY money was conditional on institutional childbirths, offering a cash incentive ranging  
51 from INR 1,000 (rural) to INR 1,400 (urban) for women below the poverty line, the PMMVY  
52 extends support to all eligible Indian women, granting INR 5,000 (approximately US\$ 60 in 2024)  
53 (the sum of JSY and PMMVY fulfils the NFSA entitlement) for their first live birth upon fulfilling  
54 certain conditions, including pregnancy registration, receiving antenatal care, birth registration,  
55 and ensuring the administration of essential vaccinations for newborns (Government of India,  
56 2022). The PMMVY's design draws inspiration from existing state specific CCT programs, namely  
57 the Muthu Lakshmi Scheme in Tamil Nadu and the Mamata Scheme in Odisha (Balasubramanian  
58 and Ravindran, 2012; Raghunathan et al., 2017). Although prior studies have demonstrated the  
59 positive impact of state-specific schemes on enhancing the odds of receiving of essential health  
60 and nutrition interventions (counselling for breastfeeding, antenatal care, and vaccinations),  
61 improved food security outcomes, and reducing undernutrition (child stunting and anaemia), there  
62 is currently insufficient evidence regarding the effectiveness of the PMMVY on these outcomes  
63 (Balasubramanian and Ravindran, 2012; Chakrabarti et al., 2021; Raghunathan et al., 2017).

64 In this study, we assessed the impact of the PMMVY on children's nutrition outcomes. Our  
65 descriptive analyses revealed that the coverage of PMMVY in its first four years falls below that  
66 of successful predecessor CCTs like the JSY. Nonetheless, the program has achieved considerable  
67 scale in targeting firstborn children, albeit with some instances of second born children also being  
68 covered. Through the analysis of three rounds of India's National Family Health Surveys (NFHS)  
69 (2005-06, 2015-16 and 2019-21), we investigated changes in key child anthropometric outcomes  
70 among over 300,000 surveyed children in India, comparing periods before and after the  
71 implementation of PMMVY across appropriate comparison groups.

72 One of the primary challenges in evaluating whether cash transfers improve outcomes is  
73 identifying a plausible counterfactual: what would a child's nutritional status have been in the  
74 absence of receiving transfers? PMMVY was launched nationwide, during a period of increasing  
75 spending on healthcare, thus, any improvements in child nutrition after PMMVY could reflect  
76 broader trends and not be caused by PMMVY. In such scenarios, the most widely used method for  
77 isolating causal effects of transfer programs is adopting a difference-in-differences (DID) design  
78 using panel data. For PMMVY, we use pooled data from NFHS-4 (2015-16) and NFHS-5 (2019-  
79 21) on infants and young children. Children aged 0-5 years born before 2017 were untreated  
80 cohorts (pre-PMMVY) and those born after 2017 were treated cohorts (post-PMMVY). The  
81 second requirement for DID is identifying an appropriate control group. Since the NFHS did not  
82 directly ask women if they received PMMVY benefits, the next best option is to compare women  
83 who received any perinatal CCT to women who did not. Since PMMVY registration is  
84 implemented by the same frontline workers who register beneficiaries for the JSY and other pre-  
85 existing perinatal CCTs (already nationally implemented for over 10 years), women who opt for  
86 existing CCTs are also likely to opt for the PMMVY. Comparing changes in outcomes in the CCT

87 group versus changes in outcomes in the non-CCT groups would provide an intent to treat DID  
88 estimate for CCT beneficiaries. However, this DID estimate is prone to potential biases because  
89 CCT and non-CCT women may have large differences in observed and unobserved characteristics,  
90 which may result in selection bias, even if the pre-intervention parallel trends assumption was  
91 satisfied. Moreover, the CCT group contains children of higher birth orders, who were not entitled  
92 to receive PMMVY money, further skewing the DID estimate downwards, and not isolating the  
93 impact of PMMVY.

94 To account for both sources of bias, we add a third axis of comparison; comparing the DID between  
95 firstborns (treated children) to second born children (non-treated) (Olden and Møen, 2022). The  
96 resulting Triple Difference (TD) estimate is credible because unobservable characteristics of first  
97 and second born children within the CCT and non-CCT groups would be similar (Aronow and  
98 Miller, 2019). For example, within the CCT group, mothers of first and second born children would  
99 likely have similar wealth, height, and education. Further, omitted variables that distinguish first  
100 and second born children in India would likely be similar across the CCT and non-CCT groups.  
101 For example, any knowledge of best practices from firstborns would get transmitted during the  
102 care of second born children, and this transmission is expected to be similar across CCT and non-  
103 CCT groups.

104 Employing TD analyses, we showed that exposure to the PMMVY was associated with modest  
105 improvements in WAZ (0.05 SD) and HAZ (0.08 SD) among firstborn CCT children. Using an  
106 indirect placebo test with a fake treatment, the parallel trends assumption was not rejected for both  
107 outcomes in the TD model. To investigate potential mechanisms behind the positive effect on  
108 anthropometric outcomes, we estimated the effect of the program on conditionalities. PMMVY  
109 increased the odds of pregnancy registration, antenatal care, and immunizations, by 12%, 6% and

110 10%, respectively. These findings suggest PMMVY likely improves child anthropometric  
111 outcomes though program conditionalities. Exploring heterogeneities in coefficients, we found  
112 that PMMVY impacts were larger and significant when the program was delivered by the health  
113 ministry compared to other entities, suggesting that prior experience with national transfers (JSY)  
114 may have played a role for program success. Moreover, we found that program impacts for HAZ  
115 were twice as large for children from poor households (0.10 SD) compared to non-poor households  
116 (0.05 SD). Impact coefficients for HAZ also varied by sex with significant impacts for males (0.14  
117 SD) but not for females (0.06 SD), suggesting that higher son preference among beneficiary  
118 mothers may have resulted in higher allocation of financial resources towards boys.

119 Next, we examined performed a benefit-cost analysis of PMMVY for its three-year impact. For  
120 this, we fit a state-level birth cohort model for firstborns born between 2017 to 2020. We use  
121 program expenditure data from the Indian parliament as the explanatory variable to test if  
122 differences in per head program spending across states and birth cohorts predict an increase in  
123 anthropometry. Here we find that INR 1,000 per head higher program expenditure is associated  
124 with a 1.27 percentage point (pp) reduction in underweight and 1.38 pp reduction in stunting,  
125 among first born CCT children, compared to non-CCT children. Building upon this expenditure-  
126 outcome relationship, we subsequently estimate the economic returns of the program. Economic  
127 analyses suggest that PMMVY delivered substantial health benefits, with a short-run benefit-cost  
128 ratio of 1.35, indicating cost-effectiveness.

129 Current implementation challenges of the PMMVY program include lengthy documentation for  
130 enrolment, linking bank accounts with social security numbers, and securing cooperation from  
131 frontline workers and child development project officers. These obstacles hinder access to the  
132 program, especially for women with limited education. Payment delays further limit the timely

133 utilization of funds. Despite these challenges, our study shows that PMMVY is cost-effective and  
134 implemented at scale, benefiting from India's past experience with cash transfer programs. The  
135 recent (2022) extension of PMMVY benefits to second-born girl children indicates broader future  
136 coverage. Our findings suggests that CCT programs like PMMVY hold promise for improving  
137 child health and well-being in India and beyond.

138 The subsequent section of this paper is organized as follows: Section 2 discusses the history of  
139 maternal cash transfer programs in India, with a focus on the PMMVY program. Section 3  
140 outlines the data sources used in the study. Section 4 describes the empirical strategy used to assess  
141 the impact of the PMMVY program. Then, Section 5 present our key findings, and Section 6  
142 demonstrates the heterogeneous impact of the program. Section 7 provides a benefit-cost analysis  
143 for the program. Finally, Section 8 concludes by presenting the paper's strengths and limitations,  
144 while underscoring implementation challenges.



## 145 2 Background

### 146 2.1 Maternal Cash Transfer Programs in India

147 India has a long history of designing and executing large-scale social protection programs for the  
148 poor and marginalized communities (Drèze and Khera, 2017; Kapur and Nangia, 2015; Sen and  
149 Rajasekhar, 2012). Examples of such programs include housing programs (Pradhan Mantri Gramin  
150 Awas Yojana) for the rural poor and workfare programs (Mahatma Gandhi National Rural  
151 Employment Guarantee Act), among others. The national government implements various food  
152 and nutrition programs such as the Public Distribution System for households below the poverty  
153 line, Integrated Child Development Services for children between 0 and 6 years, and the Mid-Day  
154 Meal program for children in the upper primary classes (Chakrabarti et al., 2021, 2019; Kishore  
155 and Chakrabarti, 2015).

156 Figure 1. Landscape of India's maternal cash transfer programs, 1987-2021

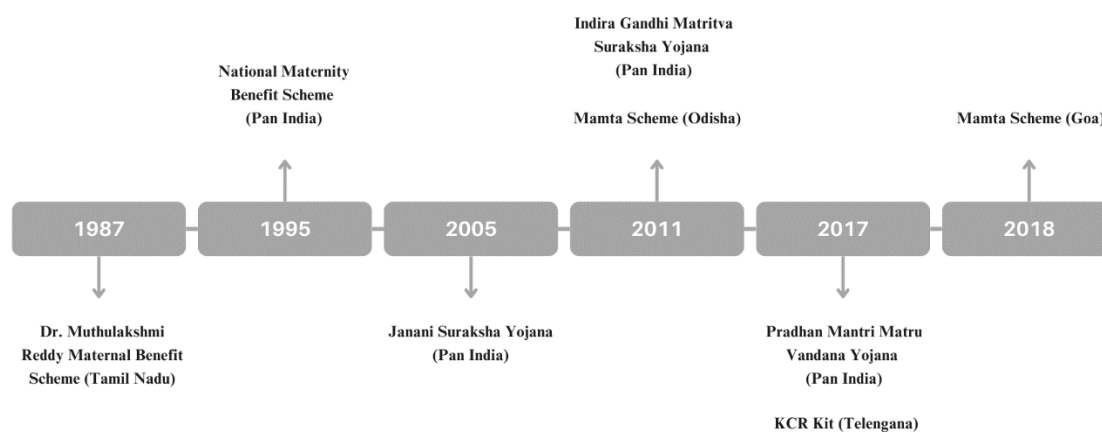

157 Note: Telangana and Tamil Nadu are situated in southern India, while Odisha is located in the eastern part, and Goa is positioned  
158 in western India. The Mamta Scheme refers to a scheme for mothers. KCR Kit in Telangana is named after Chief Minister K.  
159 Chandrasekhar Rao, under whose tenure the program was launched.  
160

161 Governments at both the national and regional levels have implemented programs exclusively  
162 targeting pregnant women (Bhatia et al., 2006; Godha and Hotchkiss, 2022). These programs

163 provide conditional or unconditional cash directly to the beneficiaries, vouchers to pregnant  
164 women for seeking healthcare services for free, or a combination of both (Chowdhry, 2013). Since  
165 the 1980s, maternal cash-only transfer programs have been implemented, as shown **Figure 1**  
166 **(Table S1)**. Tamil Nadu, a southern state in India, launched the first maternal cash transfer program  
167 called the Dr. Muthulakshmi Reddy Maternity Benefit Scheme in 1987, aimed at reducing infant  
168 and maternal mortality rates. In 1995, the Government of India launched its own maternal cash  
169 transfer scheme, the National Maternal Benefit Scheme, covering women from poor households  
170 for two live births. This program was later revamped in 2005 and launched as JSY to promote  
171 institutional delivery, especially in rural areas (Bhatia et al., 2006).

172 Success attained by JSY in increasing antenatal care and in-facility births, along with a reduction  
173 in prenatal and neonatal births, inspired additional maternal cash transfer programs in the  
174 following decade (Lim et al., 2010). The Indian government piloted the Indira Gandhi Matritva  
175 Sahyog Yojana (IGMSY) program in 52 of the 640 districts between 2011 and 2016, providing  
176 INR 4,000 for the first two live births (Haaren and Klonner, 2021; Sinha et al., 2016). During the  
177 same period, the state government of Odisha launched the Mamata Scheme in Odisha, disbursing  
178 a total of INR 5,000 to provide partial wage compensation to pregnant and nursing women for the  
179 first two live births (Chakrabarti et al., 2021; Patwardhan, 2023).

180 In January 2017, the Government of India revamped the IGMSY program to PMMVY, catering  
181 to pregnant and lactating women throughout the country for the first live birth. The government in  
182 the state of Telangana launched its own conditional maternal cash transfer program around the  
183 same time for economically weaker sections of society. In the subsequent year, the Government  
184 of the state of Goa launched its own Mamata scheme providing INR 10,000 to women for  
185 delivering a girl child at a registered medical facility.

## 186 2.2 *The PMMVY Program*

187 Under PMMVY, a sum of INR 5,000 is transferred in three instalments to eligible beneficiaries  
188 for their first live birth upon fulfilling certain conditionalities. In theory, a combination of  
189 PMMVY and JSY would provide a beneficiary INR 6,000 (INR 6,400) in urban (rural) areas. The  
190 objectives of PMMVY are two pronged: firstly, to offer partial income compensation to allow a  
191 pregnant/lactating woman appropriate rest before and after the delivery of her first child; and  
192 secondly to enhance pregnant and lactating women's health and nutrition seeking practices and  
193 behaviour (Government of India, 2022).

194 PMMVY is a collaborative effort between both the national and state governments, with each  
195 sharing the financial cost of the implementation. In Union Territories, which are designated as  
196 special administrative regions governed by the central government, the entire cost of the program  
197 is borne by central government. In hilly areas and states with special status, the central government  
198 provides 90% of the funding, with the remaining 10% contributed by the state governments.  
199 Across the rest of the country, the central government funds 60% of the program, with state  
200 governments covering the remaining 40%. The Ministry of Women and Child Development  
201 (MWCD) oversees the program's implementation at the national level, while individual state  
202 governments can house the program at the MWCD, health department, or social welfare and justice  
203 departments.

204 Details on eligibility, supporting documents required for processing the payments, and timing of  
205 payments are provided in **Table S2**. In the period we cover for the current analysis, payments were  
206 made in three instalments. For their first pregnancy, women receive the first instalment of INR  
207 1,000 upon completion of pregnancy registration within 150 days of pregnancy. The second

208 instalment of INR 2,000 is after 180 days of pregnancy conditional and upon women completing  
209 at least one antenatal care check-up. The third instalment of INR 2,000 is paid upon completing  
210 childbirth registration and the first cycle of BCG, OPV, DPT and Hepatitis B vaccinations for the  
211 firstborn child.

## 212 **3 Data, program coverage, outcomes, and covariates**

### 213 *3.1 Data Sources*

214 For impact assessments, we used mother-child and household-level data from three rounds of the  
215 Indian National Family Health Surveys (NFHS, equivalent to Demographic Health Surveys in  
216 other countries) in 2005-06 (NFHS-3), 2015-2016 (NFHS-4) and 2019-2021 (NFHS-5). We refer  
217 to these surveys as the 2005, 2015, and 2020 rounds from here on. These cross-sectional surveys  
218 follow a systematic, multi-stage stratified sampling design, covering all states/union territories in  
219 India. While the 2005 round is representative at the country and state level, the 2015 and 2020  
220 rounds are representative at country, state and district levels. Given that PMMVY was launched  
221 in 2017, the 2005 round allows us to examine pre-intervention secular trends, the 2015 round  
222 serves as the pre-intervention baseline and the 2020 round provides post intervention period  
223 estimates, facilitating a pre-post comparison. We use data on the youngest child for every mother  
224 in the sample because data on perinatal cash transfers is only available for these children. We  
225 exclude Tamil Nadu, Puducherry, Odisha, and Telangana from the analyses because they already  
226 or simultaneously implemented state-wide perinatal cash transfers (Chakrabarti et al., 2021;  
227 Patwardhan, 2023; Raghunathan et al., 2017). We supplement NFHS data with cash disbursement  
228 data on PMMVY from the data bank of India's parliament (Ministry of Women and Child  
229 Development, 2021) along with population data from the Health Management Information System  
230 and the Indian census to conduct a benefit-cost analysis of PMMVY.

231 The pooled NFHS-4 and NFHS-5 samples comprised N=367,741 children under five years old.  
232 After excluding children without valid anthropometric measurements (N=38,174), those from  
233 Tamil Nadu, Puducherry, Odisha, and Telangana (N=32,785) and third and higher birth order

234 children (N=100,791), the final analysis sample was N=296,782 children under five years old  
235 (**Figure S1**). For all our analyses, we exclude all third-born and subsequent children because  
236 previous literature suggests that high birth order children are more likely to experience growth  
237 faltering in India and are systematically different from their older siblings (Jayachandran and  
238 Pande, 2017; Spears et al., 2019). **Figure S2** shows that third and higher birth orders were very  
239 different from first and second born children in trends and outcome levels. The remaining sections  
240 focus on first and second born children for descriptives, identification strategy for our empirical  
241 model, and robustness checks.

### 242 *3.2 Disbursement and coverage of PMMVY*

243 We estimate coverage of PMMVY in two ways. First, we use the total number of women who  
244 registered for PMMVY between 2017 and 2021. To convert absolute numbers to percentages, we  
245 use total live births in this period from Health Management Information System and the birth order  
246 distribution of Indian children from the Census to estimate an upper bound for PMMVY coverage.  
247 Per Census and HMIS data, out of the 43.56 million firstborn children, 50.8% were covered by  
248 PMMVY between 2017 and 2020 on average. **Figure 2** shows the trend in coverage of PMMVY  
249 since its rollout in 2017, with 63% of eligible beneficiaries being reached in 2019–20. However,  
250 the per-capita disbursement as a proportion of total eligible beneficiaries was low, with the highest  
251 being INR 2,953 (approximately US\$ 36) per capita spending on the eligible population for 2019-  
252 20. Among beneficiaries who received PMMVY funds, disbursements ranged between INR 1,106  
253 to INR 4,690, on average.

254

255

256 Figure 2. Resource allocation and program utilization for PMMVY between 2017 and 2021

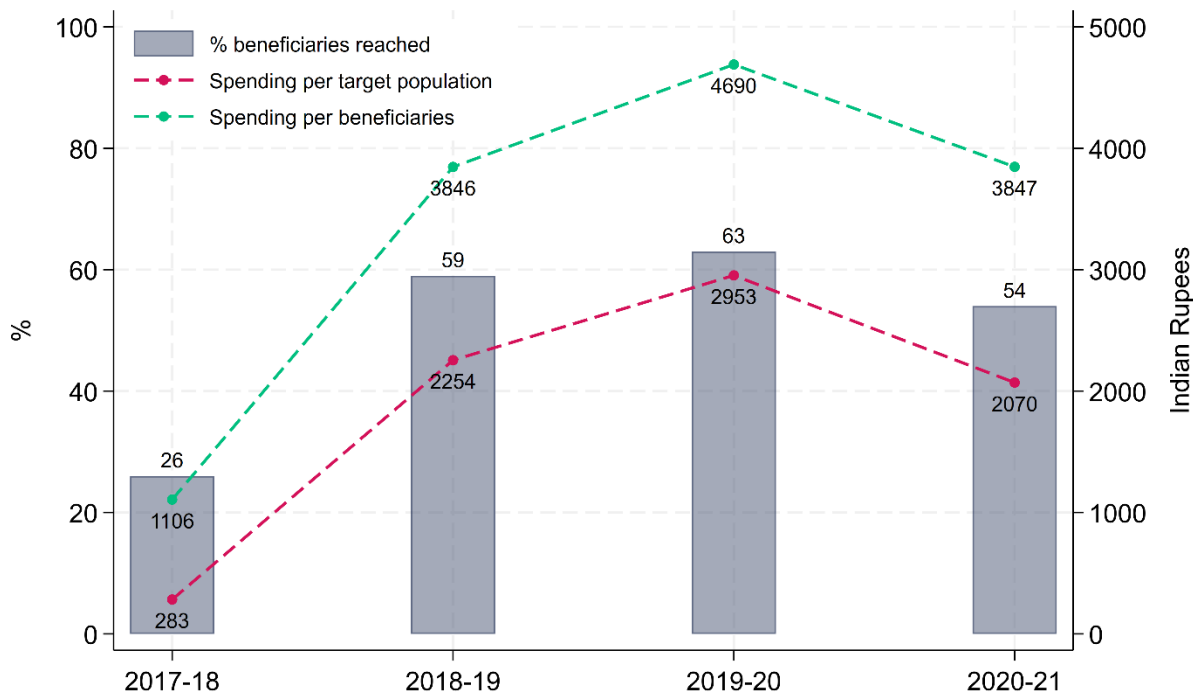

257 Notes: PMMVY refers to Pradhan Mantri Matru Vandana Yojana. The coverage and expenditure figures are based on data from  
258 the Health Management Information System, the Census Sample Registration System, and responses filed by the Ministry of  
259 Women and Child Development in the Indian parliament.  
260

261 Second, the 2015 and 2020 NFHS rounds also provide data on women who received money from  
262 the JSY or any other perinatal cash transfer; along with the amount they received from JSY. It does  
263 not, however, ask any direct question about PMMVY. In the absence of a specific PMMVY  
264 variable, we calculated the percentage of women who reported receiving money from any perinatal  
265 cash transfer and those who reported receiving INR 5,000 or more as a proxy for PMMVY  
266 coverage. However, the proportion of mothers receiving INR 5,000 or more, is likely an  
267 underestimate of PMMVY coverage because women familiar with JSY would report accurate  
268 amounts (around INR 1,400), whereas women unfamiliar with JSY may report higher amounts if  
269 they benefited from other transfers. Therefore, the ‘proxy’ PMMVY coverage variable from NFHS  
270 is only used for descriptive analyses and to validate our identification strategy. Per NFHS data, in  
271 2015, mothers of 34.5% of firstborns and 35.8% of second born children received any perinatal

272 CCT (**Figure 3, Panel A**). Coverage among firstborns (36.5%) increased by 2020 but decreased  
273 for the second born children (32.5%). Between 2015 and 2020, among JSY beneficiaries, mothers  
274 who received at least INR 5,000 increased from 1.3% to 22.5% for firstborns (**Figure 3, Panel A**).  
275 Together, these statistics suggest that PMMVY was rolled out between 2015-16 and 2019-21, and  
276 firstborns received the most benefits. However, 5.6% of mothers did report receiving INR 5,000  
277 for their second born child (**Figure 3, Panel B**). This may be attributed to other cash transfer  
278 programs, instances where the firstborn child may have died, or mistargeting of PMMVY.

279 Figure 3. Coverage of perinatal cash transfer programs in India based on the NFHS 4 and 5

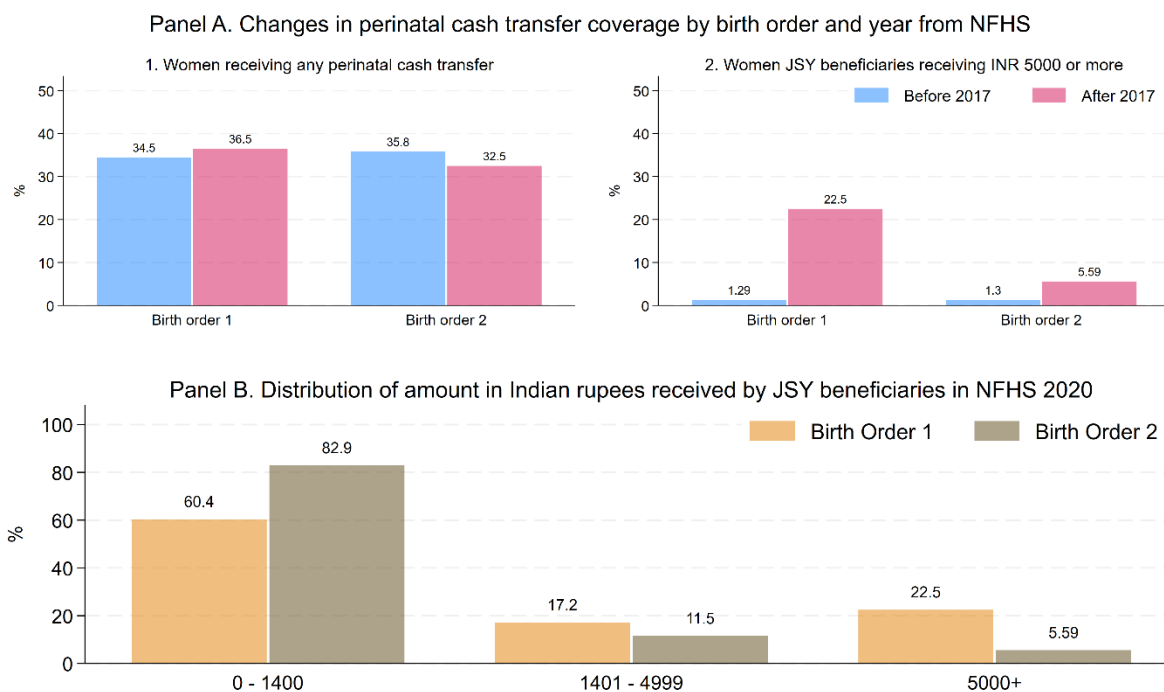

280 Notes: States with existing maternal benefits programs, such as Tamil Nadu, Odisha, and Puducherry, were dropped from the NFHS  
281 sample to isolate the PMMVY beneficiaries. Indicators on cash transfer and amount of cash received are based on the question  
282 asked for JSY in the NFHS.  
283

### 284 3.3 Outcomes

285 Child height and weight were measured by well-trained researchers using SECA-874U digital  
286 scales, SECA-213 stadiometers and SECA-417 infantometers (International Institute for



287 Population Sciences, 2022). We use age (in months), height (in centimetres), weight (kg) and the  
288 WHO age-sex growth standards to calculate the z-scores for children aged 0 to 5 years (de Onis,  
289 2006; Vidmar et al., 2013). The outcomes of interest are height-for-age z-score (HAZ), weight-  
290 for-age z-score (WAZ), stunting ( $HAZ < -2$  SD) and child underweight ( $WAZ < -2$  SD). While WAZ  
291 and HAZ respectively measure child weight and linear growth on a continuous scale relative to  
292 healthy children globally, underweight and stunting indicate if a child is undernourished with  
293 respect to global standards. All four outcomes are globally recognized as markers of undernutrition  
294 among children and have been prioritized under the sustainable development goals (Fullman et al.,  
295 2017).

### 296 *3.4 Covariates*

297 Child-level covariates include age (months), sex (male/female). Mother-level covariates include  
298 height (cm), body mass index ( $kg/m^2$ ), age (years), and education (years). Household-level  
299 covariates include health insurance (binary), family size (number), religion (Hindu, Muslim,  
300 Christian), caste (disadvantaged, tribal) and wealth quintile (ranging from 1-5). A wealth index  
301 was constructed with a principal component analysis of household's characteristics including  
302 source of drinking water, type of toilet facilities, type of flooring, exterior wall material, type of  
303 roofing, cooking fuel, electricity, home ownership, domestic helper, number of household  
304 members per sleeping room, ownership of a bank or post office account and having a mattress,  
305 pressure cooker, chair, cot/bed, table, electric fan, radio/transistor, black-and-white television,  
306 color television, sewing machine, mobile phone, any other telephone, computer, refrigerator,  
307 watch or clock, bicycle, motorcycle or scooter, an animal-drawn cart, car, water pump, thresher,  
308 tractor and livestock (cows ,camels, goats, horse, chicken, pigs) (Filmer and Pritchett, 2001). The

309 index was constructed after pooling the NFHS rounds to obtain a consistent measure of asset  
310 poverty over time. In other words, within wealth quintiles, households have the same set of assets  
311 and amenities across NFHS rounds. Among the covariates included, maternal height, education,  
312 BMI, and household wealth, in that order, are among the strongest predictors of child  
313 undernutrition in India (Li et al., 2020). The remaining variables are standard socio-demographic  
314 controls that account for residual variation and improve precision.

## 315 **4 Empirical Strategy and Identification of the Effects of Cash** 316 **Transfers**

317 Ideally, random assignment of women to PMMVY would allow causal estimation of the average  
318 effect of the intervention. However, in the absence of a randomized assignment of individuals to  
319 treatment (i.e., exposure to PMMVY), we treated the timing and targeting of PMMVY as a natural  
320 (or quasi) experiment. For PMMVY, there may be unobservable child-specific factors (e.g.,  
321 location, ingrained dietary habits, etc.) that are associated with receiving a cash benefit and child  
322 undernutrition (de Groot et al., 2017; Fernald et al., 2008). Such factors, however, are likely to be  
323 relatively invariant over the short-term (Shadish et al., 2002). There may also be time-varying  
324 factors that could bias estimates, such as the national implementation of child health and nutrition  
325 programs. The preferred method of controlling for both issues is to use longitudinal data and  
326 estimate difference-in-differences (DID) models (Angrist and Pischke, 2009; Shadish et al., 2002).  
327 The DID estimation strategy requires that (1) outcome data be available before and after the  
328 intervention and (2) treatment and control (comparison) groups can be clearly distinguished. Here,  
329 examination of temporal changes within the treated group (between 2016 and 2021) controls for  
330 factors that don't change in the short term. Accounting for change in outcomes within the  
331 comparison group acts as a counterfactual estimate for what would have happened in the absence  
332 of PMMVY and controls for factors that may change over time but are common to both groups.  
333 In other words, by looking at the changes in the treated group, while taking into account changes  
334 in the comparison group before and after the intervention, we can obtain the average treatment  
335 effect estimates (Angrist and Pischke, 2009). However, the PMMVY's unique features offer an  
336 opportunity to compare multiple groups in a Triple Difference (TD) framework to further account  
337 for remaining biases (Olden and Møen, 2022). Such biases may stem from time varying factors  
338 that are group specific, for instance rates of economic growth among low SES households (that

339 are more likely take up PMMVY) may have trended differently compared to high SES households.  
340 The triple difference estimator can be computed as the difference between two difference-in-  
341 differences estimators with two comparison groups.

#### 342 *4.1 Comparison group 1: perinatal cash transfer non-beneficiaries*

343 Finding an appropriate comparison group for PMMVY requires identifying children who were not  
344 eligible to receive PMMVY money, before and after PMMVY was implemented. As mentioned  
345 earlier, there is no variable that directly identifies PMMVY beneficiaries in the NFHS. However,  
346 the PMMVY selection mechanism is likely to resemble processes present in other pro-poor  
347 perinatal cash transfers like the JSY for which variables are available in NFHS (Carvalho et al.,  
348 2014; Lim et al., 2010). Even though PMMVY is available to mothers from all households,  
349 beneficiaries are likely to belong to lower SES groups because the INR 5,000 entitlement would  
350 not likely incentivise upper SES households. In other words, mothers who take-up the JSY (already  
351 nationally implemented for over 10 years) are also likely to opt in for the PMMVY. Thus, as our  
352 first comparison group, we compared any perinatal CCT beneficiaries to non-beneficiaries.

353 Yet, this comparison group is likely to suffer from selection bias stemming from the demand side;  
354 PMMVY non-beneficiaries may make health-specific demand choices due to unobserved factors  
355 that are systematically different from beneficiaries. Even if pre-intervention parallel trends would  
356 hold, the groups may trend differently overtime due to large differences in their covariates. Further,  
357 in this comparison, it would be difficult to isolate the effects of PMMVY money from other  
358 perinatal CCTs. Finally, even the CCT group contains second born children, who were not eligible  
359 for PMMVY. Taking these concerns together, any DID estimates comparing CCT to non-CCT  
360 children would be likely be biased.

## 361 *4.2 Comparison group 2: second born children*

362 To account for sources of bias mentioned above, we add another axis of comparison, comparing  
363 the CCT versus non-CCT DID between firstborns (treated children) to second born children (non-  
364 treated) (Olden and Møen, 2022). The resulting TD estimate is more credible because  
365 unobservable characteristics of first and second born children within the CCT and non-CCT groups  
366 would likely be similar (Aronow and Miller, 2019). In other words, adding another control group  
367 improves exchangeability of participants in the sample, making them similar on unobservable  
368 variables that may confound results (Aronow and Miller, 2019). Exchangeability refers to the  
369 assumption that, after conditioning on observed variables, the treated and control groups have  
370 similar potential outcomes, enabling estimation of causal effects from observational data. For  
371 example, first and second born children among CCT and non-CCT mothers would likely have  
372 similar wealth, maternal height, BMI, and education, constituting the strongest known confounders  
373 for child undernutrition (Table 1). Further, omitted variables that distinguish first and second born  
374 children in India would likely be similar across the CCT and non-CCT groups. For example, any  
375 knowledge of best practices from firstborns would get transmitted during the care of second born  
376 children, but this transmission is likely similar across CCT and non-CCT groups. The validity of  
377 TD on balancing observed covariates is discussed in the results section (**Table 1**).

## 378 *4.3 Triple difference estimating model*

379 Since this model has two pre-post comparison groups, (1) perinatal CCT versus non-CCT children  
380 and (2) first versus second born children, the TD model is the unbiased difference between two  
381 DID models that may have been separately biased. In other words, biases in comparing first and  
382 second born CCT children are differenced out by using the difference of first and second born non-

383 CCT children as a control. Additionally, biases in comparing CCT and non-CCT firstborns are  
384 differenced out by using the difference of CCT and non-CCT second born children as a control.  
385 The intuition is that the difference between two biased DID estimators will be unbiased if the bias  
386 is the same in both estimators (Olden and Møen, 2022). The effects estimated by equation 1 are  
387 intent-to-treat (ITT) estimates because our TD strategy models potential exposure of mothers who  
388 are likely to opt for the PMMVY. Our approach does not exclusively identify children who were  
389 direct beneficiaries of the PMMVY. ITT is a policy-relevant parameter for an ex-post analysis of  
390 the effects of a large policy on the entire target population (Angrist et al., 1996).

391 Our primary empirical strategy relies on pooling data from NFHS-4 and NFHS-5. To estimate the  
392 average treatment effect for PMMVY, we fit a triple difference model with *equation 1* for child  $i$ ,  
393 born to mother  $m$ , from household  $h$  in community  $c$  in year of survey  $t$ :

$$394 Y_{imhct} = \beta_0 + \beta_1 CCT_i + \beta_2 BO1_i + \beta_3 Post_t + \beta_4 CCT_i * BO1_i + \beta_5 CCT_i * Post_t + \beta_6 BO1_i * \\ 395 Post_t + \beta_7 BO1_i * CCT_i * Post_t + \sum_{j=8}^J \beta_j X_{jimhct} + C_c + \epsilon_{imhct} \dots (1)$$

396 where  $Y_{imhct}$  is a continuous outcome (HAZ or WAZ).  $CCT_i$  is a treatment dummy that takes value  
397 0 for non-CCT firstborn children, i.e. those born to mothers who reported that they did not receive  
398 any perinatal cash transfer, and 1 for CCT firstborn children.  $BO1_i$  is a treatment dummy that takes  
399 value 0 for second born children and 1 for firstborns.  $Post_t$  is a time dummy that takes value 0 for  
400 data for children born before 2017 and 1 for children born after 2017.  $C_c$  are community fixed  
401 effects which control for all neighbourhood or village specific time-invariant (in the short run)  
402 confounders such as climate, disease burden, and urbanicity, among others.  $X_{jimhct}$  represents the  
403 vector of covariates included at the individual and household level ( $\beta_j$  indicates specific coefficient  
404 corresponding to each covariate within  $X_{jimhct}$ ).  $\epsilon_{imhct}$  is an error term that represents residual

405 variation. Standard error estimates are clustered at the community-level to account for intra-  
406 community correlations.

407  $\beta_0$  is the pre2017 prevalence among non-CCT second born children.  $\beta_1$  is the mean difference in  
408 outcomes in CCT second born children compared to non-CCT second born children before 2017.  
409  $\beta_2$  is the mean difference in outcomes for non-CCT firstborns compared to non-CCT second born  
410 children before 2017.  $\beta_3$  is the change in outcomes comparing non-CCT second born children after  
411 2017 to before 2017.  $\beta_4$  is the mean difference in outcomes before 2017 comparing the difference  
412 of CCT firstborns to non-CCT firstborns to the difference of CCT second born children to non-  
413 CCT second born children.  $\beta_5$  is the mean difference in change (before 2017 to after 2017) in  
414 outcomes for CCT second born children above and beyond the difference in non-CCT second born  
415 children.  $\beta_6$  is the mean difference in change (before 2017 to after 2017) in outcomes for non-CCT  
416 firstborns compared to the change for non-CCT second born children. Finally,  $\beta_7$  is the mean  
417 difference in change (before 2017 to after 2017) in outcomes for CCT firstborns compared to non-  
418 CCT firstborns compared to the changes for CCT second born children compared to non-CCT  
419 second born children.  $\beta_7$  is the TD estimator and parameter of interest for our analysis  
420 (Muralidharan and Prakash, 2017).

#### 421 *4.4 Parallel trends assumption for triple difference models*

422 Like DID models, the underlying assumption for TD models is that the relative outcome of second-  
423 and first-born children in the CCT group trend in the same way as the relative outcome of second-  
424 and first-born children in the non-CCT group, in the absence of treatment (Olden and Møen, 2022).  
425 We test this assumption with a placebo regression using equation 1 using only NFHS4 data. The  
426 key difference in the placebo regression is that  $Post_t$  is a time dummy that takes value 0 for birth

427 years before 2014 and 1 for 2014, 2015 and 2016. We omit the vector of covariates  $X_{jimhct}$  and  
428  $C_c$ . Since PMMVY did not exist for cohorts born between 2014-2016 this model measures the  
429 impact of a fake treatment on firstborns born between 2014 and 2016 (just before PMMVY). In  
430 this test,  $\beta_7$  should not be significant and should be of a small order for evidence of parallel trends.  
431 In other words, we assume that difference of outcomes would have trended similarly for the two  
432 groups in the absence of the intervention of interest (Olden and Møen, 2022).

#### 433 *4.5 Randomization inference test for triple difference models*

434 To rule out the possibility that our primary results were obtained by statistical chance, we estimated  
435 coefficients using Fisher's exact test using randomization inference. Here, we randomly assigned  
436 the three-way interaction term from our main model and ran 1000 iterations using the "RITEST"  
437 Stata module (Heß, 2017). The randomization inference procedure tests whether our main result  
438 was obtained by pure chance over 1000 randomized treatment assignments. Lower p values in this  
439 test indicate the probability that our main results were obtained by pure chance.



## 440 **5 Main results**

### 441 *5.1 Distribution of covariates within treatment groups*

442 Table 1 shows summary statistics comparing covariates across the different comparison groups in  
443 the study at baseline. As expected, among CCT beneficiaries, families were poorer, on average,  
444 and had six family members living in a household. Mothers of firstborns were 2.7 years younger  
445 and had 1.2 years more education than those of second born children. However, these differences  
446 were largely eliminated after comparing first and second born children within the CCT (1.2 years)  
447 and non-CCT groups (1.5 years). Subtracting estimates for firstborns from second born children,  
448 largely eliminated differences in most covariates across the CCT and non-CCT groups, lending  
449 credibility to the TD design. However, there were 2.3% fewer male firstborn children in the CCT  
450 group, likely because parents may try for a male child if the firstborn was female (Pande and  
451 Malhotra, 2006). Thus, son preference presents one potential avenue of bias for the TD models,  
452 which we later explore in heterogeneity analyses.

Table 1. Summary statistics of covariates among comparison groups in preintervention period

|                                  | Conditional cash transfer (CCT) group |               |               |               |                              | Non-Conditional cash transfer (non-CCT) group |               |               |               |                                  |                      |
|----------------------------------|---------------------------------------|---------------|---------------|---------------|------------------------------|-----------------------------------------------|---------------|---------------|---------------|----------------------------------|----------------------|
|                                  | Birth order 1                         |               | Birth order 2 |               | CCT<br>difference<br>BO1-BO2 | Birth order 1                                 |               | Birth order 2 |               | non-CCT<br>difference<br>BO1-BO2 | Triple<br>difference |
|                                  | Mean/%                                | 95%CI         | Mean/%        | 95%CI         |                              | Mean/%                                        | 95%CI         | Mean/%        | 95%CI         |                                  |                      |
| Mother's height, cm              | 151.7                                 | [151.6,151.8] | 151.9         | [151.8,152.0] | -0.2                         | 152.4                                         | [152.3,152.5] | 152.2         | [152.1,152.3] | 0.2                              | -0.4                 |
| Mother's BMI, kg/m <sup>2</sup>  | 20.6                                  | [20.6,20.7]   | 20.9          | [20.8,20.9]   | -0.3                         | 21.6                                          | [21.5,21.6]   | 21.7          | [21.7,21.8]   | -0.1                             | -0.2                 |
| Mother's age, year               | 23.4                                  | [23.4,23.5]   | 26.1          | [26.0,26.1]   | -2.7                         | 24.1                                          | [24.1,24.2]   | 26.6          | [26.5,26.7]   | -2.5                             | -0.2                 |
| Mother's education, year         | 7.8                                   | [7.7,7.9]     | 6.6           | [6.5,6.6]     | 1.2                          | 9.2                                           | [9.1,9.3]     | 7.7           | [7.6,7.8]     | 1.5                              | -0.3                 |
| Socio-economic status score, 1-5 | 2.5                                   | [2.5,2.6]     | 2.5           | [2.5,2.5]     | 0                            | 3.2                                           | [3.2,3.2]     | 3.0           | [3.0,3.1]     | 0.2                              | -0.2                 |
| Health insurance, %              | 22.8                                  | [21.9,23.7]   | 22.7          | [21.8,23.6]   | 0.1                          | 38.3                                          | [21.2,22.6]   | 20.7          | [20.0,21.4]   | 1.2                              | -1.1                 |
| Family size, #                   | 5.7                                   | [5.7,5.8]     | 6.0           | [6.0,6.1]     | -0.3                         | 21.9                                          | [5.7,5.8]     | 6.2           | [6.1,6.2]     | -0.4                             | 0.1                  |
| Hindu, %                         | 82.0                                  | [81.2,82.9]   | 83.4          | [82.6,84.1]   | -1.4                         | 5.8                                           | [75.8,77.3]   | 77.5          | [76.8,78.2]   | -0.9                             | -0.5                 |
| Muslim, %                        | 13.4                                  | [12.6,14.1]   | 12.2          | [11.6,12.8]   | 1.2                          | 76.6                                          | [15.8,17.1]   | 16.4          | [15.7,17.0]   | 0                                | 1.2                  |
| Christian, %                     | 1.6                                   | [1.3,1.8]     | 1.6           | [1.3,1.9]     | 0                            | 16.4                                          | [1.9,2.4]     | 2.0           | [1.7,2.2]     | 0.2                              | -0.2                 |
| Scheduled caste, %               | 23.6                                  | [22.7,24.5]   | 23.3          | [22.4,24.2]   | 0.3                          | 2.2                                           | [17.6,19.0]   | 18.6          | [17.9,19.3]   | -0.3                             | 0.6                  |
| Scheduled tribe, %               | 12.8                                  | [12.1,13.4]   | 11.6          | [10.9,12.2]   | 1.2                          | 18.3                                          | [7.6,8.4]     | 8.7           | [8.3,9.1]     | -0.7                             | 1.9                  |
| Child age, months                | 23.1                                  | [22.8,23.4]   | 26.2          | [25.8,26.5]   | -3.1                         | 8.0                                           | [22.4,23.0]   | 25.9          | [25.6,26.2]   | -3.2                             | 0.1                  |
| Child sex male, %                | 51.6                                  | [50.6,52.7]   | 53.9          | [52.9,54.9]   | -2.3                         | 22.7                                          | [53.4,55.1]   | 54.7          | [53.9,55.5]   | -0.5                             | -1.8                 |
| Observations                     | 17819                                 |               | 18606         |               |                              | 31386                                         |               | 31506         |               |                                  |                      |

Note: Summary statistics are generated using the NFHS 4 data. The sample is limited to only the first and second-born children under 5 years with non-missing anthropometric measurements. Socio-economic status scores are constructed based on principle component analysis of household assets. BMI refers to Body-Mass Index.

456 *5.2 Trends in child anthropometry and changes after PMMVY*

457 We observed similar trends in outcomes between 2005 and 2015 for first and second born children  
 458 in the sub-sample of perinatal CCT beneficiaries (**Figure 4, Panel A**). Trends appear to deviate  
 459 after 2015, with firstborns showing faster improvements than second born children in this period.  
 460 Similarly, trends pre 2015 were similar for CCT and non-CCT beneficiaries among firstborn  
 461 children for both anthropometric outcomes (**Figure 4, Panel B**). However, for HAZ, trends deviate  
 462 after 2015 for CCT beneficiaries.

463 **Figure 4. Trends in anthropometric outcomes among Indian children 0-5 years, 2005-2021**

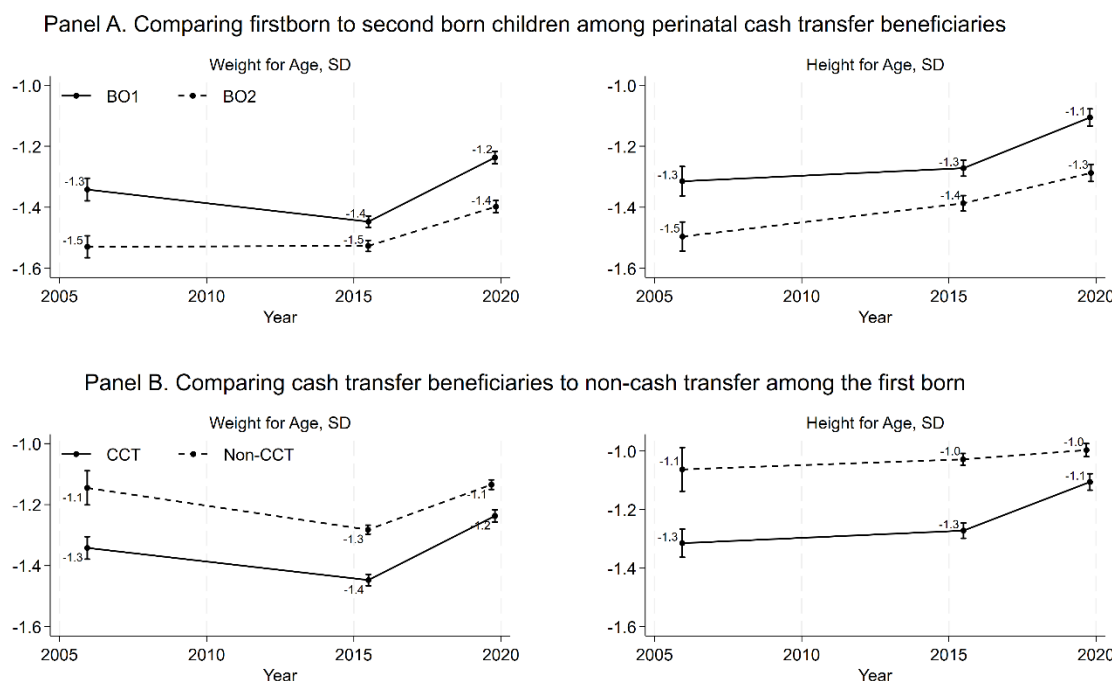

464 Notes: Plots represent the pooled data from NFHS 3, 4, and 5. Weight for age and Height for age z-scores calculated for birth order  
 465 1 (BO1) and birth order 2 (BO2), along with those who received conditional cash transfer (CCT) and those who didn't (non-CCT).  
 466 Because no national perinatal CCT programs existed in 2005, we predicted the probability of receiving a perinatal CCTs for mothers  
 467 in 2005 using a logit regression model using data from 2015 and 2020. We use the full set of child, mother, and household level  
 468 covariates and state fixed effects as predictors. A probability threshold (>0.2) where there was maximum improvement in accuracy  
 469 of correctly predicting a perinatal CCT beneficiary in 2015 and 2020 was used to classify potential CCT beneficiaries in 2005.  
 470

471 **Figure 5 (also Table S3)** shows the TD impact coefficients ( $\beta_7$ ) estimated using equation 1. In  
 472 the unadjusted TD model, PMMVY was significantly associated with higher WAZ (0.11 SD,

473  $p < 0.001$ ) and HAZ (0.11 SD,  $p < 0.001$ ). In the model with community fixed effects which  
474 accounted for all unobserved time invariant community level confounders, PMMVY was  
475 significantly associated with higher WAZ (0.08 SD,  $p < 0.001$ ) and HAZ (0.12 SD,  $p < 0.001$ ). In  
476 the fully adjusted model, which included community fixed effects and the full set of covariates,  
477 PMMVY was significantly associated with higher WAZ (0.05 SD,  $p < 0.001$ ) and HAZ (0.08 SD,  
478  $p < 0.001$ ). The direction and magnitude of coefficients on HAZ and WAZ for PMMVY estimated  
479 in the TD model are in line with other studies evaluating maternal CCTs such as the 2005 JSY,  
480 IGMSY, or Mamta scheme in Odisha in the Indian context (Chakrabarti et al., 2021; Ghosh and  
481 Kochar, 2018; Kekre and Mahajan, 2023; Patwardhan, 2023; von Haaren and Klonner, 2021). For  
482 example, Patwardhan (2023) estimated that WAZ improved by 0.16 SD after the implementation  
483 of Mamata, and Kekre and Mahajan (2023) estimated a WAZ impact of 0.14 SD. Similarly,  
484 whereas, studies on Mamata and IGMSY reported modest and insignificant effects on HAZ,  
485 Chakrabarti et al (2019) found 10% lower odds of stunting among CCT beneficiaries in Odisha.  
486 Moreover, global systematic reviews suggest that, on average, CCTs may improve HAZ by 0.024  
487 SD, indicating a marginally higher impact of PMMVY for this outcome (Fernald et al., 2012;  
488 Manley et al., 2022). Unlike most global CCTs which do not report significant impacts on WAZ,  
489 our models indicate that targeted CCTs can significantly improve this outcome.

490

491

492

493 Figure 5. Triple difference coefficients on anthropometric outcomes comparing perinatal cash  
494 transfer beneficiaries to non-beneficiaries and firstborns to second born children between 2015  
495 and 2021

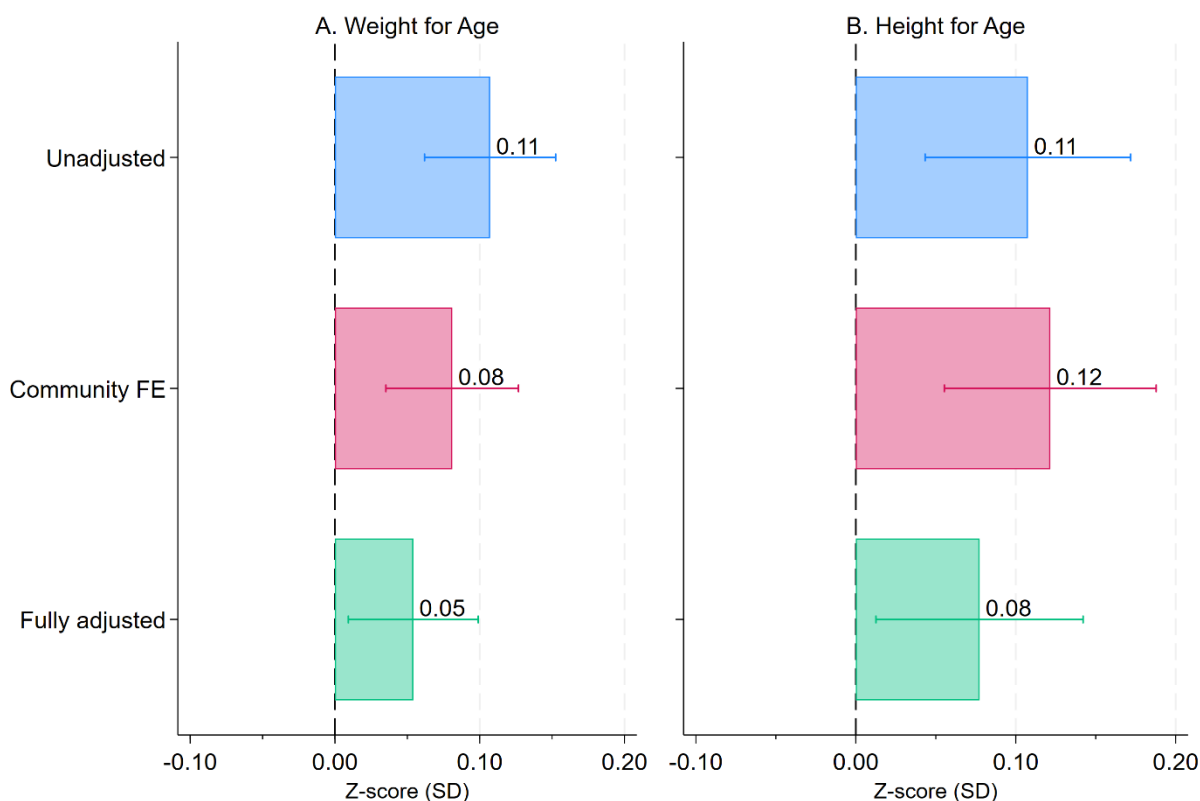

496 Notes: Coefficients estimated using equation 1 (TD) are shown. Bands represent 95% confidence intervals. Community fixed effect  
497 model is a partially adjusted model which is stratified on community and includes community fixed effects. Covariates in the fully  
498 adjusted model include health insurance, family size, Hindu, Muslim, Christian, scheduled caste, scheduled tribe, socio-economic  
499 status score, mother's height, mother's age, mother's education, child age, child sex, and COVID-19 lockdown. Standard errors are  
500 clustered at the community level.  
501

502 Visualizations for pre-intervention trends in WAZ and HAZ across birth cohorts are shown in  
503 **Figure S3**. The figures show that parallel trends existed for WAZ and HAZ across CCT and non-  
504 CCT groups for first and second born children before 2017. However, since these visualizations  
505 do not directly test for parallel trends in a TD framework, we present the placebo regression  
506 estimates in **Table S4** to indirectly test the assumption. The placebo TD estimate is not statistically  
507 significant for WAZ and HAZ ( $p > 0.10$ ). Therefore, we do not reject the assumption of parallel  
508 trends for our main outcomes. Furthermore, as a robustness check for our main model, we ran the  
509 randomization inferences procedure (Heß, 2017) on the key outcome variables. **Table S5** shows

510 that the triple interaction term's coefficient in our primary fully adjusted model differs significantly  
511 from coefficients obtained from 1,000 random treatment assignments ( $p < 0.05$ ). In other words, the  
512 probability that our main results were obtained purely by chance is very low.

### 513 *5.3 Potential pathways*

514 We examine potential pathways to impacts on HAZ and WAZ by running regressions using the  
515 conditionalities of the PMMVY and evidenced based intermediate outcomes from systematic  
516 reviews (Manley et al., 2022). Conditionality related outcomes include pregnancy registration  
517 (binary), if the mother received four or more antenatal care (ANC) visits during pregnancy  
518 (binary), and whether the child received the full set of recommended immunizations (binary).  
519 Evidenced based outcomes included child level consumption of animal source foods (binary),  
520 whether the child achieved minimum diet diversity (binary), and diarrhoea incidence among  
521 children in the 15 days prior to the survey (binary) (Manley et al., 2022). Globally, the prevailing  
522 thesis suggest that poor households tend to spend more money on animal source foods compared  
523 to grains or tubers when they receive more money. We run these analyses with *equation 1* using a  
524 logit model for binary outcomes using the GEE GLM procedure described earlier.

525 Logit regressions on intermediate outcomes or pathways for impact (**Figure 6**) suggest that  
526 PMMVY works through its conditionalities: higher pregnancy registration (Odds ratio=1.12,  
527  $p \leq 0.10$ ), 4+ ANC (OR=1.06,  $p < 0.05$ ), and immunization (OR=1.10,  $p < 0.001$ ) among firstborn  
528 CCT beneficiaries in 2020 compared to the counterfactual. Earlier maternal CCTs in India, such  
529 as JSY, IGMSY, and Mamata reported similar results for vaccination uptake and antenatal  
530 checkups (Aizawa, 2022; De and Timilsina, 2020; Debnath, 2021; Lim et al., 2010; von Haaren

531 and Klonner, 2021). For example, the Mamata scheme is estimated to have increased the odds of  
532 full immunization by 35% (Chakrabarti et al., 2021) .

533 For other intermediate outcomes, there was no significant impact of PMMVY. A possible  
534 explanation for a lack of impact observed for diarrhoeal disease is that diarrhoea is reported as an  
535 incidence measure with a recall of 15 days in the NFHS. Given that diarrhoea is highly seasonal  
536 and the NFHS doesn't visit households across all seasons, the outcome may not provide an accurate  
537 representation of diarrhoea prevalence. For dietary outcomes, a lack of impact on animal source  
538 foods may be due to large prevalence of vegetarianism in India (Ferry, 2023; Petrikova, 2022).  
539 Moreover, since the DHS uses a 24-hour dietary recall, for children older than 6 months, the survey  
540 timing likely does not align well with the window of the tranches. This may result in an  
541 underestimation of impacts on diet.

542 Figure 6. Pathways to impact: adjusted triple difference logistic regression coefficients of  
543 intermediate outcomes for PMMVY

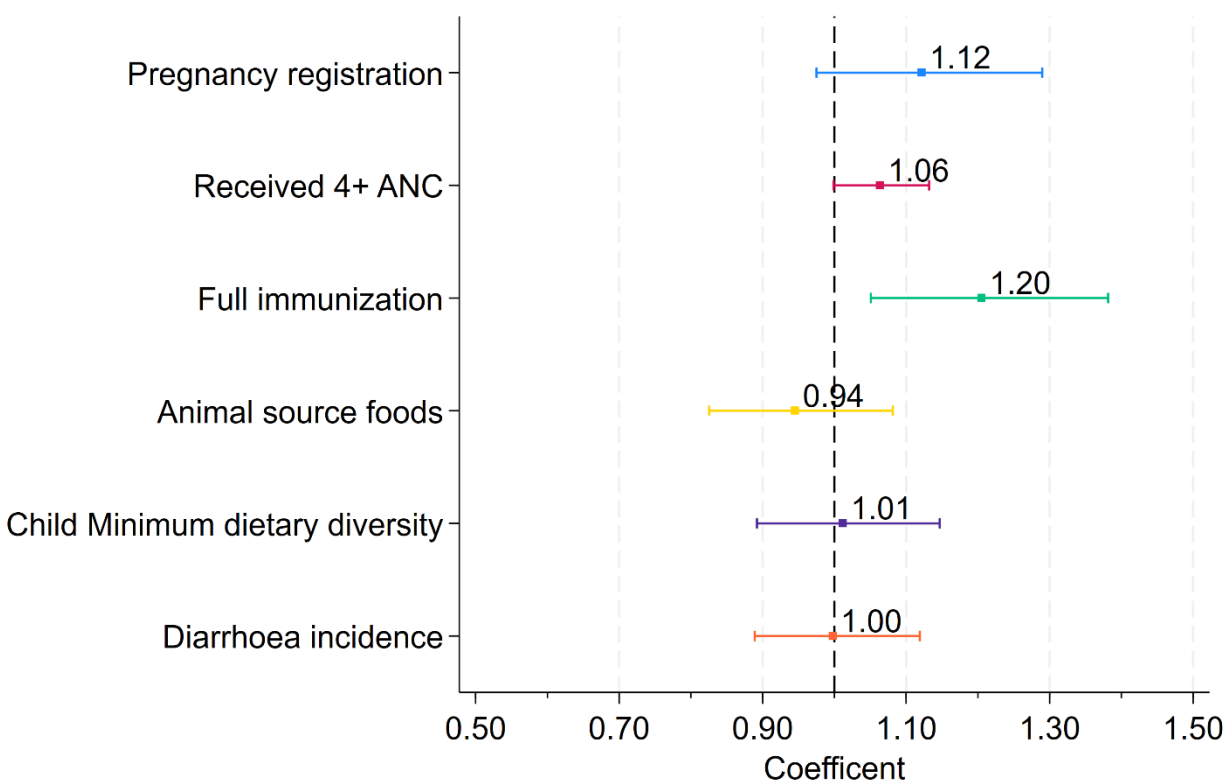

544 Notes: All the outcome variables are in binary. Coefficients are from a logit regression Generalized Estimating  
545 Equation (GEE) with Generalized Linear Models (GLM) fit using equation 1 and an exchangeable or compound  
546 symmetry correlations structure on the community. Covariates in the fully adjusted logit model include health  
547 insurance, family size, Hindu, Muslim, Christian, scheduled caste, scheduled tribe, socio-economic status score,  
548 mother's height, mother's age, mother's education, child age, child sex, and COVID-19 lockdown. The regressions  
549 were run using GEE with GLM fit is using equation 1 and an exchangeable or compound symmetry correlations  
550 structure on the community. The exchangeable correlation is similar to community fixed effects but more efficiently  
551 corrects point estimates assuming the correlation structure within each community is uniform across all pairs of  
552 observations within that community.  
553



## 554 **6 Heterogeneity in the Effects of the PMMVY Program**

555 Large publicly funded cash transfer programs have a differential impact on beneficiary groups  
556 depending on contextual factors (Galiani and McEwan, 2013; Millán et al., 2019). In the Indian  
557 context, literature has demonstrated heterogeneous impacts of JSY based on income levels and  
558 awareness about government health programs (Debnath, 2021). Similarly, for the Mamata scheme  
559 in Odisha, a differential effect of the program was observed across child sex and household wealth  
560 (Kekre and Mahajan, 2023). Importantly, child sex was also differently distributed across first and  
561 second born children, and CCT groups and therefore could influence our TD results. Thus, we  
562 examine heterogeneity across Indian states via departmentalism, household wealth, and child sex.

### 563 *6.1 Departmentalism*

564 The PMMVY program provides flexibility for states and union territories to designate either the  
565 Ministry of Women and Child Development (MWCD), Ministry of Health and Family Welfare  
566 (MHFW), or Social Welfare and Justice (SWJ) departments for the program's implementation,  
567 while the MWCD assumes the role of the national coordinating agency. Each of these departments  
568 possesses distinct mandates, organizational structures, and operational protocols, with the MWCD  
569 primarily responsible for coordinating initiatives related to women and children. Successful  
570 execution of a program of such magnitude necessitates sufficient human resources, expertise in  
571 managing social welfare schemes, and robust local infrastructure.

572 **Table S6** delineates the states that have opted for implementation through various ministries,  
573 including health, MWCD, and SWJ. We employed the WAZ and HAZ TD model specification  
574 across the three subgroups (**Figure 7**). In the adjusted models both WAZ (0.13 SD,  $p < 0.001$ ) and

575 HAZ (0.19 SD,  $p < 0.001$ ) were significant for states where MHFW is responsible for implementing  
576 PMMVY. In the states where MWCD and SJW implements PMMVY, the results were modest  
577 and not significant. While it would be expected that the presence of departmental synergies at both  
578 national and state levels in MWCD should result in efficiency gains, our seemingly  
579 counterintuitive result is likely explained by the fact MHFW is more experienced at delivering  
580 national CCTs via JSY and may have achieved greater fidelity in program implementation through  
581 this mechanism.

582 Figure 7. State level PMMVY implementation department's heterogeneity effect on  
583 anthropometric outcomes using fully adjusted model

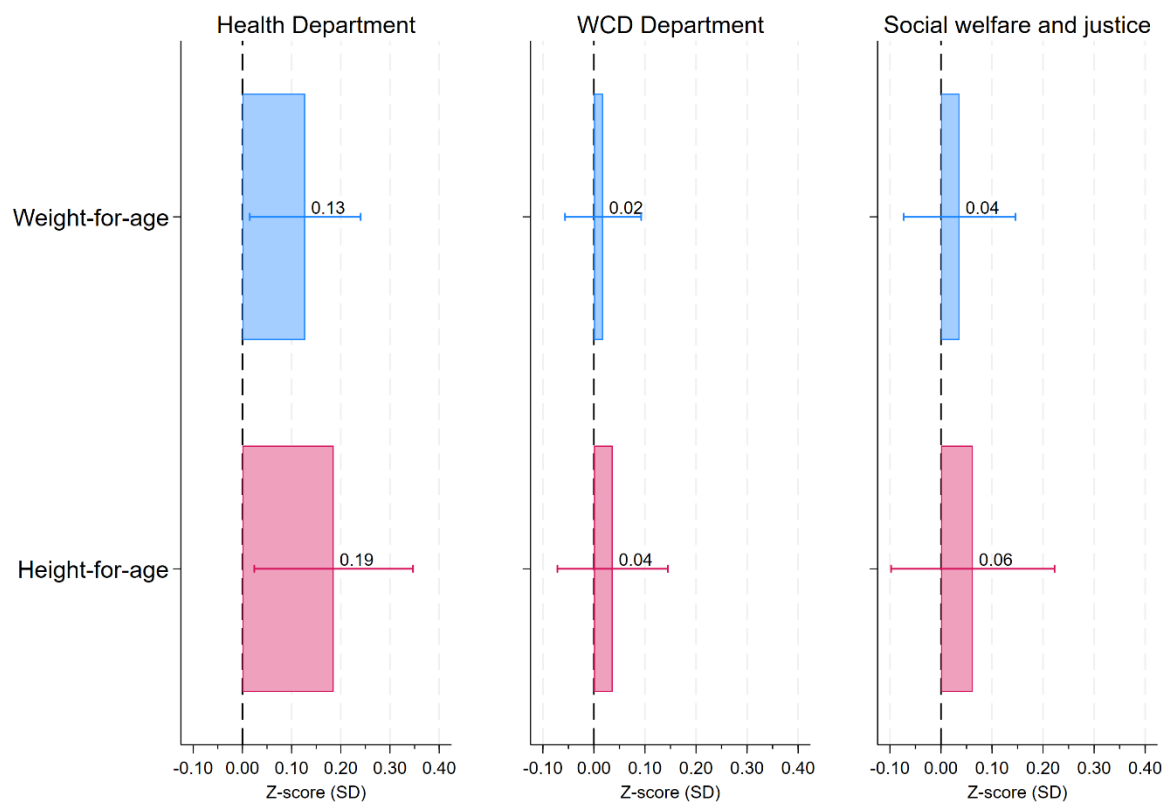

584 Note: Coefficients estimated using equation 1 (TD) and subsample are shown. Bands represent 95% confidence intervals.  
585 Covariates in the fully adjusted model include health insurance, family size, Hindu, Muslim, Christian, scheduled caste, scheduled  
586 tribe, socio-economic status score, mother's height, mother's age, mother's education, child age, child sex, and COVID-19  
587 lockdown. Standard errors are clustered at the community level.  
588

589

## 590 *6.2 Impact on the poor*

591 CCTs programs like PMMVY are targeted towards women and children from poor households.  
592 Evidence from other Indian transfers have also shown larger benefits among the poor. For  
593 example, India's flagship food subsidy programs, the Public Distribution System and Mid-day  
594 Meal Scheme, have documented pro-poor benefits (Chakrabarti et al., 2021; Kishore and  
595 Chakrabarti, 2015). Given the prior evidence, we expected PMMVY to also impact the poor  
596 differentially. **Figure 8** shows larger coefficients on HAZ (0.10 SD,  $p < 0.05$ ) in poor sub-sample  
597 compared to the non-poor sub-sample (0.05 SD,  $p > 0.1$ ). The result on HAZ is likely attributable  
598 to the fact that mostly women from poor households access public health care in India and that  
599 ₹5000 is not likely to incentivize the non-poor to opt in. Moreover, this evidence also agrees with  
600 larger impacts on severely stunted children, who are also likely to belong to poor households.

601 Effects on WAZ were not significant in both groups. Coefficients for WAZ may have attenuated  
602 because these regressions were run on sub-samples of poor and non-poor. This statistically results  
603 in a different counterfactual for the TD model. For example, the TD in the poor sub-sample  
604 compares trends among poor CCT children to poor non-CCT children, whereas the TD in the full  
605 sample, includes poor and non-poor children.

606 Figure 8. Heterogeneity effect on anthropometric outcomes based on household wealth levels  
607 using fully adjusted model

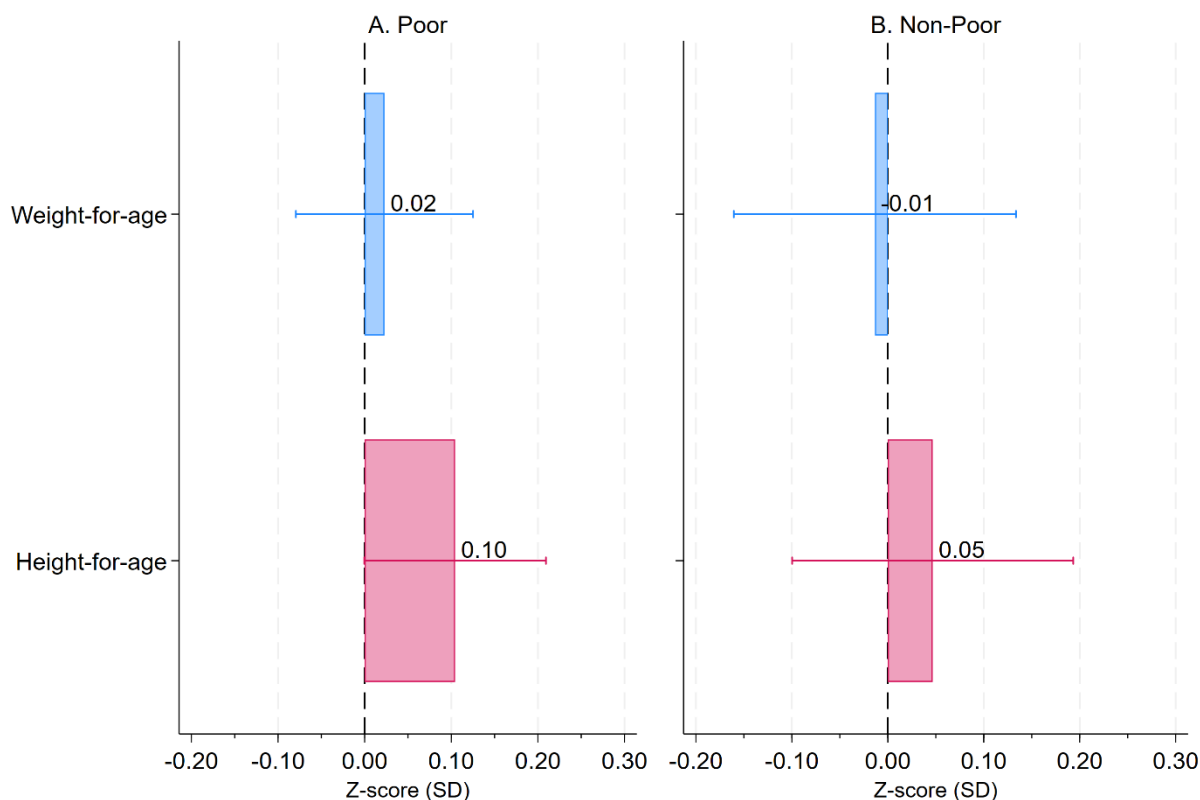

608 Note: Coefficients estimated using equation 1 (TD) and subsample are shown. Poor comprises of bottom three wealth quintiles  
609 while non-poor comprises of top two quintiles. Bands represent 95% confidence intervals. Covariates in the fully adjusted model  
610 include health insurance, family size, Hindu, Muslim, Christian, scheduled caste, scheduled tribe, socio-economic status score,  
611 mother's height, mother's age, mother's education, child age, child sex, and COVID-19 lockdown. Standard errors are clustered at  
612 the community level.  
613

### 614 6.3 Sex of the child

615 Gender-based discrimination and the preference for sons in India have been extensively  
616 documented and numerous studies have examined various aspects of this practice, including the  
617 prenatal determination of the child's gender, postnatal neglect of the girl child's dietary needs, and  
618 insufficient investment in the health and education of female children (Anukriti, 2018; Barcellos  
619 et al., 2014; Bharadwaj and Lakdawala, 2013; Borooh, 2004; Jayachandran, 2017; Jayachandran  
620 and Kuziemko, 2011). These factors may contribute to the heterogeneous impact of CCTs,

621 whereby male children exhibit higher birth weights and WAZ compared to female children (Kekre  
622 and Mahajan, 2023).

623 Figure 9. Heterogeneity effect on anthropometric outcomes based on child's sex using fully  
624 adjusted model

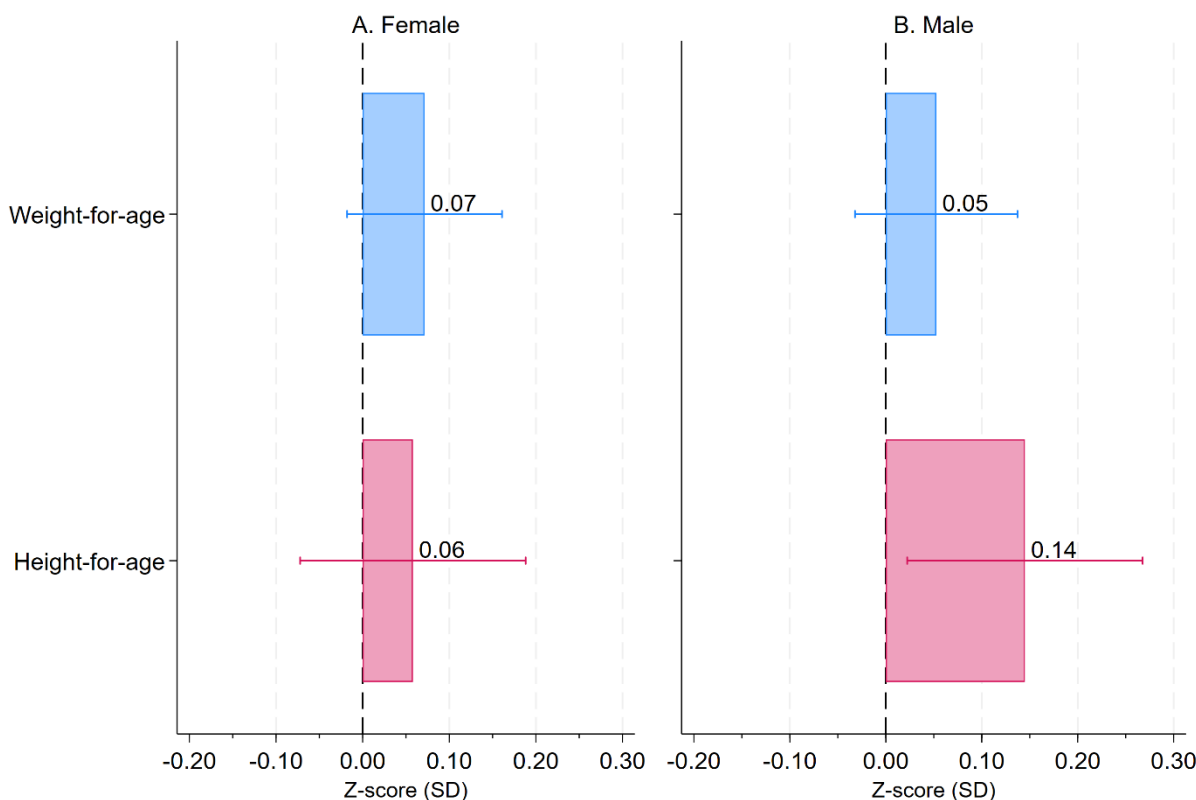

625 Note: Coefficients estimated using equation 1 (TD) and subsample are shown. Bands represent 95% confidence intervals.  
626 Covariates in the fully adjusted model include health insurance, family size, Hindu, Muslim, Christian, scheduled caste, scheduled  
627 tribe, socio-economic status score, mother's height, mother's age, mother's education, child age, child sex, and COVID-19  
628 lockdown. Standard errors are clustered at the community level.  
629

630 **Figure 9** demonstrates the varying effects of PMMVY on key anthropometric outcomes based on  
631 the sex of the child. Males (0.14 SD,  $p < 0.05$ ) have a higher and statistically significant impact on  
632 the PMMVY program compared to females (0.06 SD,  $p > 0.1$ ). One possible explanation for this  
633 disparity in anthropometric outcomes for girls is that female children have been reported to receive  
634 an inadequate diet, lower breastfeeding, vitamin supplementation and care after birth compared to  
635 male children (Barcellos et al., 2014; Borooh, 2004; Jayachandran and Kuziemko, 2011). It is

636 likely that cash received from the program may have been more likely to be used to enhance growth  
637 and nutrition for males compared to females, especially if the male child was a first born. This is  
638 because of prevalent beliefs that first born males will eventually support the family financially or  
639 carry on the family legacy.

## 640 **7 Economic analyses**

### 641 *7.1 Expenditure-outcome relationship*

642 We use parliamentary expenditure data to estimate to the association between PMMVY spending  
643 at the state-year level and child anthropometry outcomes. For this, we restrict the sample to first  
644 born children and aggregate our data by state, birth-year, and CCT received (N=667). We fit a  
645 model with *equation 2* for state  $s$ , in birth-cohort  $t$ , CCT status  $c$ :

$$646 \quad Y_{cst} = \beta_0 + \beta_1 \text{Expenditure}_{st} + \beta_2 \text{CCT}_{cst} + \beta_3 \text{CCT}_{cst} * \text{Expenditure}_{st} + \sum_{j=4}^J \beta_j X_{jcst} \\ 647 \quad + S_s + T_t + \epsilon_{cst} \dots (2)$$

648 The model estimates the potential increase in HAZ, WAZ, stunting and underweight per amount  
649 spent on PMMVY.  $\text{Expenditure}_{st}$  varies by state and birth-cohort and represents an additional  
650 INR 1,000 per beneficiary spent on PMMVY.  $\text{CCT}_{cst}$  indicates whether the observation represents  
651 firstborn CCT beneficiaries in the state and birth cohort. The interaction,  $\beta_3$  estimates the dose  
652 response relationship between PMMVY money and undernutrition for firstborn CCT beneficiaries  
653 compared to firstborn non-CCT beneficiaries among firstborn children. The model adjusts for state  
654 fixed effects  $S_s$ , birth year fixed effects  $T_t$ , and the full set of household, mother, and child specific  
655 covariates  $X_{jcst}$ .

656 There was heterogeneity in the coverage and expenditure on PMMVY across Indian states between  
657 2017 and 2021 (**Table S7**). **Table 2** shows the effect of program expenditure on anthropometric  
658 outcomes using state-level birth cohort-specific per capita expenditure as a predictor. On average,  
659 for every additional INR 1,000 (approx.US\$12) increase in the per capita spending on the eligible

660 population, WAZ [0.063, p<0.001] and HAZ [0.066, p<0.01]) improved in the fully adjusted  
 661 models that controlled for child, mother, household level covariates and fixed effects. Similarly,  
 662 for every additional INR 1,000, underweight decreased by 1.27 percent points (p<0.05) and  
 663 stunting by 1.38 percentage points (p<0.05), on average among firstborns.

664 Table 2. Association between anthropometric outcomes and state-level birth cohort-specific per  
 665 capita expenditure on PMMVY among first-born children born between 2010 and 2021

|                                                  | <b>Partially<br/>adjusted</b>          | <b>Fully<br/>adjusted</b>    | <b>Partially<br/>adjusted</b>       | <b>Fully<br/>adjusted</b>     |
|--------------------------------------------------|----------------------------------------|------------------------------|-------------------------------------|-------------------------------|
|                                                  | <b>Weight for Age (WAZ), SD</b>        |                              | <b>Height for Age (HAZ), SD</b>     |                               |
| PMMVY expenditure per-capita, 1000 Indian rupees | -0.034**<br>[-0.067, -0.001]           | -0.033*<br>[-0.067, 0.000]   | -0.052**<br>[-0.096, -0.009]        | -0.059***<br>[-0.101, -0.017] |
| Perinatal cash beneficiary, proportion           | -0.176***<br>[-0.237, -0.115]          | -0.091**<br>[-0.174, -0.008] | -0.153***<br>[-0.223, -0.082]       | -0.079<br>[-0.177, 0.018]     |
| PMMVY expenditure * perinatal cash beneficiary   | 0.081***<br>[0.043, 0.119]             | 0.063***<br>[0.021, 0.105]   | 0.079***<br>[0.026, 0.133]          | 0.066**<br>[0.013, 0.118]     |
|                                                  | <b>Underweight (WAZ &lt; -2 SD), %</b> |                              | <b>Stunting (HAZ &lt; -2 SD), %</b> |                               |
| PMMVY expenditure per-capita, 1000 Indian rupees | 1.117**<br>[0.090, 2.145]              | 1.118**<br>[0.188, 2.047]    | 0.81<br>[-0.211, 1.830]             | 0.878*<br>[-0.124, 1.880]     |
| Perinatal cash beneficiary, proportion           | 4.432***<br>[2.450, 6.414]             | 1.702<br>[-0.490, 3.894]     | 3.232***<br>[1.315, 5.149]          | 1.257<br>[-1.048, 3.562]      |
| PMMVY expenditure * perinatal cash beneficiary   | -1.825***<br>[-3.002, -0.648]          | -1.271**<br>[-2.468, -0.074] | -1.642***<br>[-2.871, -0.413]       | -1.383**<br>[-2.613, -0.153]  |
| Birth Year Controls                              | Yes                                    | Yes                          | Yes                                 | Yes                           |
| State Fixed Effects                              | Yes                                    | Yes                          | Yes                                 | Yes                           |
| Child Controls                                   | No                                     | Yes                          | No                                  | Yes                           |
| Mother Controls                                  | No                                     | Yes                          | No                                  | Yes                           |
| Household Control                                | No                                     | Yes                          | No                                  | Yes                           |
| N (state-birth year)                             | 648                                    | 648                          | 648                                 | 648                           |

666 Note: NFHS household data was aggregated by groups of state, birth year, birth order, and cash transfer received. PMMVY  
 667 expenditure per capita is the estimated amount spent per eligible beneficiary in a specific state-birth year. Child, mother, and  
 668 household controls include health insurance, family size, Hindu, Muslim, Christian, scheduled caste, scheduled tribe, socio-  
 669 economic status score, mother's height, mother's age, mother's education, child age, and child sex. Confidence interval at 95% for  
 670 the state level panel estimation are reported in the parentheses. \*\*\*, \*\*, \* show significance at 1%, 5% and 10%, respectively.



## 671 7.2 Benefit-cost analysis

672 Using  $\beta_3$  estimates from *equation 2* with underweight and stunting, we perform a benefit-cost  
673 analysis for PMMVY using economic analyses methods used in other studies (Chakrabarti et al.,  
674 2019). First, we multiply  $\beta_3$  by the mean values of  $CCT_{cst}$  in 2018, 2019 and 2020, respectively,  
675 to obtain the proportion of underweight and stunting prevalence averted by PMMVY in the  
676 population for those years. Second, we multiply the proportions obtained in step 1 by the total  
677 number of first-born children aged 0-1 years, who were underweight or stunted in the years 2018,  
678 2019, and 2020 to obtain the total number of cases averted. Third, we multiply the  
679 underweight/stunting averted cases by their respective disability adjusted life year (DALY) rates.  
680 Fourth, we multiply the total DALYs by the per-capita gross domestic product (GDP) of India to  
681 obtain the total economic benefit of cases averted, and sum the benefit values for 2018, 2019 and  
682 2020. Fifth, we divide the economic benefit by the total spending on the program in 2018, 2019  
683 and 2020 to obtain the short run benefit-cost ratio for PMMVY.

684 While the primary objectives of PMMVY do not explicitly target stunting and underweight  
685 reduction, our study findings pertaining to HAZ and WAZ prompted an investigation into cases of  
686 stunting and underweight averted. Moreover, the availability of DALY data through the Global  
687 Burden of Disease study for underweight and stunting facilitated economic analyses. The research  
688 presented here contributes insights into the potential secondary benefits of PMMVY and its  
689 implications for decision making among policy makers.

690 Economic analyses showed that PMMVY delivered a combined health benefit of 47,064,813  
691 DALYs averted due to underweight reduction and 26,759,834 DALYs averted due to stunting  
692 reduction (**Table 3**). Assuming the economic value of a DALY is equal to per-head GDP, the

693 combined economic benefit of PMMVY was US\$1040 million for three years with a benefit-cost  
694 ratio of 1.35, suggesting that the program was cost effective in the short-run.

695 In previous research, it has been found that implementing essential interventions during the first  
696 1000 days can result in a remarkable benefit-cost ratio of over 30 (Hoddinott et al., 2013). These  
697 estimates assume that the full range of interventions leads to a 20% reduction in undernutrition  
698 within the target population. However, our investigation reveals that despite its lower per-  
699 beneficiary cost, the PMMVY delivers a comparatively lower reduction in stunting when  
700 compared to targeted health interventions. Our calculated benefit-cost ratio of 1.35 focuses solely  
701 on immediate gains and does not account for the substantial long-term societal benefits arising  
702 from stunting reduction, which can result in even greater economic returns. Additionally, our  
703 analyses do not consider the health advantages associated with improved immunization and  
704 antenatal care coverage among program beneficiaries. Therefore, further exploration is needed to  
705 fully comprehend the potential impact of CCTs on child health and well-being in LMICs.

Table 3. Benefit-cost analysis of the PMMVY between 2018 - 2020

| Row       |                                                             | Underweight |         |        | Stunting |         |             |
|-----------|-------------------------------------------------------------|-------------|---------|--------|----------|---------|-------------|
|           |                                                             | 2018        | 2019    | 2020   | 2018     | 2019    | 2020        |
| 1         | Coefficient from regression <sup>a</sup>                    |             | -1.271  |        | -1.383   |         |             |
| 2         | Avg. per-capita spending on PMMVY, 000s <sup>b</sup>        | 2.254       | 2.953   | 2.070  | 2.254    | 2.953   | 2.070       |
| 3         | Estimated impact of PMMVY on prevalence <sup>c</sup>        | -2.865      | -3.753  | -2.631 | -3.117   | -4.084  | -2.863      |
| 4         | First born children, % <sup>d</sup>                         | 50.00       | 53.00   | 59.00  | 50.00    | 53.00   | 59.00       |
| 5         | Population of children 0-1 years, 000s <sup>e</sup>         | 23436       | 22892   | 22486  | 23436    | 22892   | 22486       |
| 6         | Number of firstborns, 000s <sup>f</sup>                     | 11718       | 12132   | 13266  | 11718    | 12132   | 13266       |
| 7         | Number cases averted by PMMVY, 000s <sup>g</sup>            | 33500       | 45500   | 34900  | 36500    | 49500   | 37900       |
| 8         | DALY rate <sup>h</sup>                                      |             | 0.41    |        |          | 0.22    |             |
| 9         | Total DALYs averted, 00000s <sup>i</sup>                    | 138         | 187     | 144    | 78       | 106     | 81          |
| 10        | GDP per capita (current US\$) <sup>j</sup>                  | 2050.20     | 1913.20 | 2238.1 | 2050.20  | 1913.20 | 2238.1      |
| 11        | Economic value of health benefit, US\$ million <sup>k</sup> | 290.61      | 367.85  | 329.84 | 163.53   | 207.00  | 185.61      |
| 12        | Total spending on PMMVY, US\$ million <sup>l</sup>          | 332.94      | 448.28  | 334.53 | 332.94   | 448.28  | 334.53      |
| 13        | Benefit-cost ratio of health benefits <sup>m</sup>          |             | 0.86    |        |          | 0.49    |             |
| <b>14</b> | <b>Total benefit to cost ratio <sup>n</sup></b>             |             |         |        |          |         | <b>1.35</b> |

707 <sup>a</sup> From Equation 2,  $\beta_3$  of the fully adjusted model for underweight and stunting (see Table 2).

708 <sup>b</sup> Authors own estimation using data from the Health Management Information System, the Census Sample Registration System, and responses filed by the Ministry of Women and  
709 Child Development in the Lok Sabha (see Table S7).

710 <sup>c</sup> Row 1 x Row 2

711 <sup>d</sup> From Indian Census's Sample Registration System Statistical Report 2018, 2019 and 2020.

712 <sup>e</sup> From United nations population prospects and adjusted for infant mortality.

713 <sup>f</sup> Row 4 x Row 5

714 <sup>g</sup> |Row 3 x Row 6|

715 <sup>h</sup> From Lancet's Global burden of disease (2019) for stunting and underweight

716 <sup>i</sup> Row 7 x Row 8

717 <sup>j</sup> From World Bank's World Development Indicators

718 <sup>k</sup> Row 9 x Row 10

719 <sup>l</sup> Based on response to Lok Sabha question no 3283 filed by the Ministry of Women and Child Development in 2021. Average exchange rate for respective years was used for INR  
720 to USD conversion.

721 <sup>m</sup> Based on  $\frac{\sum_{2018}^{2020} Row 11}{\sum_{2018}^{2020} Row 12}$  for underweight and stunting respectively.

722 <sup>n</sup> Row 13 *Underweight* + Row 13 *stunting*

723 PMMVY: Pradhan Mantri Matru Vandana Yojana; DALY: disability adjusted life years; GDP: gross domestic product

## 724 **8 Discussion**

### 725 *8.1 Strengths and limitations*

726 Strengths of our study include the use of nationally representative, repeated cross-sectional survey  
727 datasets that establish temporal order in that exposure to the PMMVY precedes the studied  
728 outcomes. We employed two sets of counterfactuals via our TD models that did not reject the  
729 assumption of parallel trends across both outcomes, and accounted for a comprehensive set of  
730 plausible confounders, thus supporting causal inference. Our study further provides insights in  
731 program pathways to impact, heterogeneity of coefficients via mechanisms like son preference,  
732 and estimates the economic viability of the program. To our knowledge, this is the first study that  
733 evaluates the PMMVY program with respect to nutrition outcomes among children in India. Our  
734 results are relevant for LMICs where perinatal CCTs are being implemented.

735 Our study is not without limitations. First, survey datasets used in our study do not provide precise  
736 information on actual receipt of the PMMVY among women in India. Our analyses estimate  
737 population level average treatment effects that rely on aggregate trends (Lachin, 2000). Second,  
738 owing to the nonrandomized nature of PMMVY receipt, confounding from unobserved variables  
739 that correspond with both exposure to PMMVY and child nutrition outcomes cannot be ruled out.  
740 Given our TD framework that comprehensively accounts for large potential confounders, any  
741 remaining biases could stem from unobserved factors that would 1) only affect firstborns but not  
742 second children within the CCT groups; 2) exhibit significant correlation with child  
743 anthropometry; and 3) not be completely accounted for by the control variables included in our  
744 analyses. Third, given the five-year gap between the two NFHS waves used in this study,  
745 maturation bias stemming from time-varying factors may likely attenuate our regression estimates

746 (Handley et al., 2018). Fourth, our benefit-cost estimates assume that the value of each DALY  
747 averted is equal to per head GDP, however, valuing human suffering in monetary terms is  
748 challenging (Chakrabarti et al., 2019).

## 749 *8.2 Barriers to implementation*

750 A recent study commissioned in three states identified various hurdles that the beneficiaries face  
751 while availing the benefits of PMMVY (Sekher and Alagarajan, 2019). It highlighted the  
752 procurement of documentation for enrolling into PMMVY as the primary hurdle (Sekher and  
753 Alagarajan, 2019). **Table S2** highlights payment tranches, as well as the conditions and  
754 documentation linked with each installment. To be eligible for these benefits, women must fill out  
755 lengthy documents for each of the three instalments. Aside from connecting their bank account  
756 with Aadhaar (the Government of India's individual identification system), they must also show  
757 their "mother-child protection" (MCP) card, husband's and their own Aadhaar card, and bank  
758 passbook (Sekher and Alagarajan, 2019). Apart from these, cooperation of Anganwadi workers  
759 and the child development project officers is also necessary for successfully filling the online  
760 application (Dreze et al., 2021). These hurdles make the procedure cumbersome, especially for  
761 women with minimal education (Kalra and Priya, 2020). Furthermore, banking-related issues such  
762 as inaccessibility of financial services, bank officials' reluctance to provide zero balance accounts,  
763 and PAN card non-availability are also observed (Dreze et al., 2021; Kalra and Priya, 2020; Sekher  
764 and Alagarajan, 2019). Even if beneficiaries are able to overcome these issues, women are far less  
765 likely than males to utilize and access their bank accounts and are thereby systematically excluded  
766 from the possible benefits of state-initiated transfers (Sabherwal et al., 2019).

767 Payment disbursement under PMMVY has often been delayed which restricts pregnant women's  
768 ability to use the funds. It was also observed that the first instalment was often not provided to  
769 pregnant women in a timely manner. In some cases, beneficiaries got all three payments at once,  
770 after the childbirth (Sekher and Alagarajan, 2019). This subsequently leads to beneficiaries  
771 spending the cash transfer amount on covering regular household expenditure rather than nutritious  
772 foods at critical points in first 1000 days (Sekher and Alagarajan, 2019). **Table S7**, based on  
773 PMMVY data on disbursements and beneficiary reach, suggests that implementation varies greatly  
774 across states. This was also observed for the JSY, which was implemented nationally (Lim et al.,  
775 2010).

776 Despite these implementation challenges, our study finds that the program has a positive impact  
777 on child anthropometry outcomes, particularly HAZ and WAZ for those who received the  
778 PMMVY cash benefit. Further, our assessment shows a decrease in underweight and stunting on  
779 average over the first three years after PMMVY rollout. A benefit-cost analysis using the reduction  
780 shows that PMMVY produces a 35% return on the amount spent during that period.

### 781 *8.3 Conclusion*

782 Our study assessed the impact of the PMMVY, a national CCT program targeting pregnant and  
783 lactating women, on children's nutrition outcomes, focusing on firstborns likely to benefit from  
784 the program. Analyzing multiple national surveys, we report that PMMVY is operational at-scale  
785 throughout India. However, despite its rights-based framework, the program presently fails to  
786 reach all entitled beneficiaries, primarily due to several implementation challenges. Nevertheless,  
787 our findings suggest that the program is associated with modest improvements in child  
788 anthropometric outcomes in a cost-effective manner, underscoring its potential to positively

789 influence child health in India. With the extension of PMMVY to second-born girls in 2022, the  
790 program stands poised to cover millions more, emphasizing the need to address known barriers to  
791 access such as lengthy documentation and delayed payment disbursement.

## References

- Aizawa, T., 2022. Does the conditional maternal benefit programme reduce infant mortality in India? *Health Policy Plan* 37, 1138–1147. <https://doi.org/10.1093/heapol/czac067>
- Angrist, J.D., Imbens, G.W., Rubin, D.B., 1996. Identification of Causal Effects Using Instrumental Variables. *J Am Stat Assoc* 91, 444–455. <https://doi.org/10.1080/01621459.1996.10476902>
- Angrist, J.D., Pischke, J.-S., 2009. *Mostly Harmless Econometrics: An Empiricist’s Companion*. Princeton University Press. <https://doi.org/10.2307/j.ctvc4j72>
- Anukriti, S., 2018. Financial Incentives and the Fertility-Sex Ratio Trade-Off. *Am Econ J Appl Econ* 10, 27–57. <https://doi.org/10.1257/app.20150234>
- Aronow, P.M., Miller, B.T., 2019a. *Foundations of Agnostic Statistics*. Cambridge University Press. <https://doi.org/10.1017/9781316831762>
- Aronow, P.M., Miller, B.T., 2019b. *Foundations of Agnostic Statistics*. Cambridge University Press. <https://doi.org/10.1017/9781316831762>
- Balasubramanian, P., Ravindran, T.K.S., 2012. Pro-Poor Maternity Benefit Schemes and Rural Women: Findings from Tamil Nadu. *Econ Polit Wkly* 47, 19–22.
- Barcellos, S.H., Carvalho, L.S., Lleras-Muney, A., 2014. Child Gender and Parental Investments In India: Are Boys and Girls Treated Differently? *Am Econ J Appl Econ* 6, 157–189. <https://doi.org/10.1257/app.6.1.157>
- Bharadwaj, P., Lakdawala, L.K., 2013. Discrimination Begins in the Womb: Evidence of Sex-Selective Prenatal Investments. *Journal of Human Resources* 48, 71–113. <https://doi.org/10.3368/jhr.48.1.71>
- Bhatia, M.R., Yesudian, C.A.K., Gorter, A., Thankappan, K.R., 2006. Demand Side Financing for Reproductive and Child Health Services in India. *Econ Polit Wkly* 41, 279–284.
- Borooah, V.K., 2004. Gender bias among children in India in their diet and immunisation against disease. *Soc Sci Med* 58, 1719–1731. [https://doi.org/10.1016/S0277-9536\(03\)00342-3](https://doi.org/10.1016/S0277-9536(03)00342-3)
- Carvalho, N., Thacker, N., Gupta, S.S., Salomon, J.A., 2014. More Evidence on the Impact of India’s Conditional Cash Transfer Program, Janani Suraksha Yojana: Quasi-Experimental Evaluation of the Effects on Childhood Immunization and Other Reproductive and Child Health Outcomes. *PLoS One* 9, e109311. <https://doi.org/10.1371/journal.pone.0109311>
- Chakrabarti, S., Khan, M.T., Kishore, A., Roy, D., Scott, S.P., 2019a. Risk of acute respiratory infection from crop burning in India: estimating disease burden and economic welfare from satellite and national health survey data for 250 000 persons. *Int J Epidemiol* 48, 1113–1124. <https://doi.org/10.1093/ije/dyz022>
- Chakrabarti, S., Khan, M.T., Kishore, A., Roy, D., Scott, S.P., 2019b. Risk of acute respiratory infection from crop burning in India: estimating disease burden and economic welfare from



- satellite and national health survey data for 250 000 persons. *Int J Epidemiol* 48, 1113–1124.  
<https://doi.org/10.1093/ije/dyz022>
- Chakrabarti, S., Pan, A., Singh, P., 2021a. Maternal and Child Health Benefits of the Mamata Conditional Cash Transfer Program in Odisha, India. *J Nutr* 151, 2271–2281.  
<https://doi.org/10.1093/jn/nxab129>
- Chakrabarti, S., Pan, A., Singh, P., 2021b. Maternal and Child Health Benefits of the Mamata Conditional Cash Transfer Program in Odisha, India. *J Nutr* 151, 2271–2281.  
<https://doi.org/10.1093/jn/nxab129>
- Chakrabarti, S., Raghunathan, K., Alderman, H., Menon, P., Nguyen, P., 2019c. India’s Integrated Child Development Services programme; equity and extent of coverage in 2006 and 2016. *Bull World Health Organ* 97, 270–282. <https://doi.org/10.2471/BLT.18.221135>
- Chakrabarti, S., Scott, S.P., Alderman, H., Menon, P., Gilligan, D.O., 2021c. Intergenerational nutrition benefits of India’s national school feeding program. *Nat Commun* 12, 4248.  
<https://doi.org/10.1038/s41467-021-24433-w>
- Chakrabarti, S., Scott, S.P., Alderman, H., Menon, P., Gilligan, D.O., 2021d. Intergenerational nutrition benefits of India’s national school feeding program. *Nat Commun* 12, 4248.  
<https://doi.org/10.1038/s41467-021-24433-w>
- Chowdhry, S., 2013. Birth of an Idea - Vouchers for Maternal Healthcare in India. *SSRN Electronic Journal*. <https://doi.org/10.2139/ssrn.2342474>
- de Groot, R., Palermo, T., Handa, S., Ragno, L.P., Peterman, A., 2017a. Cash Transfers and Child Nutrition: Pathways and Impacts. *Development Policy Review* 35, 621–643.  
<https://doi.org/10.1111/dpr.12255>
- de Groot, R., Palermo, T., Handa, S., Ragno, L.P., Peterman, A., 2017b. Cash Transfers and Child Nutrition: Pathways and Impacts. *Development Policy Review* 35.  
<https://doi.org/10.1111/dpr.12255>
- de Onis, M., 2006. WHO Child Growth Standards based on length/height, weight and age. *Acta Paediatr* 95, 76–85. <https://doi.org/10.1111/j.1651-2227.2006.tb02378.x>
- De, P.K., Timilsina, L., 2020. Cash-based maternal health interventions can improve childhood vaccination—Evidence from India. *Health Econ* 29, 1202–1219.  
<https://doi.org/10.1002/hec.4129>
- Debnath, S., 2021. Improving Maternal Health Using Incentives for Mothers and Health Care Workers: Evidence from India. *Econ Dev Cult Change* 69, 685–725.  
<https://doi.org/10.1086/703083>
- Drèze, J., Khera, R., 2017. Recent Social Security Initiatives in India. *World Dev* 98, 555–572.  
<https://doi.org/10.1016/j.worlddev.2017.05.035>
- Dreze, J., Khera, R., Somanchi, A., 2021. Maternity Entitlements Women’s Rights Derailed. *Econ Polit Wkly* 56.

- Fernald, L.C., Gertler, P.J., Neufeld, L.M., 2008a. Role of cash in conditional cash transfer programmes for child health, growth, and development: an analysis of Mexico's Oportunidades. *The Lancet*. [https://doi.org/10.1016/S0140-6736\(08\)60382-7](https://doi.org/10.1016/S0140-6736(08)60382-7)
- Fernald, L.C., Gertler, P.J., Neufeld, L.M., 2008b. Role of cash in conditional cash transfer programmes for child health, growth, and development: an analysis of Mexico's Oportunidades. *The Lancet* 371, 828–837. [https://doi.org/10.1016/S0140-6736\(08\)60382-7](https://doi.org/10.1016/S0140-6736(08)60382-7)
- Fernald, L.C.H., Gertler, P.J., Hidrobo, M., 2012. Conditional Cash Transfer Programs: Effects on Growth, Health, and Development in Young Children, in: *The Oxford Handbook of Poverty and Child Development*. Oxford University Press, pp. 569–600. <https://doi.org/10.1093/oxfordhb/9780199769100.013.0032>
- Ferry, M., 2023. Vegetarianism and Non-Vegetarian Consumption in India. pp. 29–39. [https://doi.org/10.1007/978-3-031-47847-5\\_3](https://doi.org/10.1007/978-3-031-47847-5_3)
- Filmer, D., Pritchett, L.H., 2001. Estimating wealth effects without expenditure data—or tears: An application to educational enrollments in states of India. *Demography* 38, 115–132. <https://doi.org/10.1353/dem.2001.0003>
- Fullman, N., Barber, R.M., Abajobir, A.A., et al., 2017. Measuring progress and projecting attainment on the basis of past trends of the health-related Sustainable Development Goals in 188 countries: an analysis from the Global Burden of Disease Study 2016. *The Lancet* 390, 1423–1459. [https://doi.org/10.1016/S0140-6736\(17\)32336-X](https://doi.org/10.1016/S0140-6736(17)32336-X)
- Galiani, S., McEwan, P.J., 2013. The heterogeneous impact of conditional cash transfers. *J Public Econ* 103, 85–96. <https://doi.org/10.1016/j.jpubeco.2013.04.004>
- Galicia, L., De Romaña, D.L., Harding, K.B., De-Regil, L.M., Grajeda, R., 2016. Tackling malnutrition in Latin America and the Caribbean: Challenges and opportunities. *Revista Panamericana de Salud Publica/Pan American Journal of Public Health* 40, 138–146.
- Ghosh, P., Kochar, A., 2018. Do welfare programs work in weak states? Why? Evidence from a maternity support program in India. *J Dev Econ* 134, 191–208. <https://doi.org/10.1016/j.jdeveco.2018.05.008>
- Godha, D., Hotchkiss, D.R., 2022. A decade of conditional cash transfer programs for reproductive health in India: How did equality fare? *BMC Public Health* 22, 394. <https://doi.org/10.1186/s12889-022-12563-9>
- Government of India, 2022. Frequently Asked Questions (FAQs) Pradhan Mantri Matru Vandana Yojana.
- Haaren, P., Klonner, S., 2021. Lessons learned? Intended and unintended effects of India's second-generation maternal cash transfer scheme. *Health Econ* 30, 2468–2486. <https://doi.org/10.1002/hec.4390>
- Handley, M.A., Lyles, C.R., McCulloch, C., Cattamanchi, A., 2018. Selecting and Improving Quasi-Experimental Designs in Effectiveness and Implementation Research. *Annu Rev Public Health* 39, 5–25. <https://doi.org/10.1146/annurev-publhealth-040617-014128>

- Heß, S., 2017. Randomization Inference with Stata: A Guide and Software. *The Stata Journal: Promoting communications on statistics and Stata* 17, 630–651. <https://doi.org/10.1177/1536867X1701700306>
- Hoddinott, J., Alderman, H., Behrman, J.R., Haddad, L., Horton, S., 2013a. The economic rationale for investing in stunting reduction. *Matern Child Nutr*. <https://doi.org/10.1111/mcn.12080>
- Hoddinott, J., Alderman, H., Behrman, J.R., Haddad, L., Horton, S., 2013b. The economic rationale for investing in stunting reduction. *Matern Child Nutr* 9, 69–82. <https://doi.org/10.1111/mcn.12080>
- International Institute for Population Sciences, 2022. National Family Health Survey (NFHS - 5) 2019–21 India Report.
- Jayachandran, S., 2017. Fertility Decline and Missing Women. *Am Econ J Appl Econ* 9, 118–139. <https://doi.org/10.1257/app.20150576>
- Jayachandran, S., Kuziemko, I., 2011. Why Do Mothers Breastfeed Girls Less than Boys? Evidence and Implications for Child Health in India. *Q J Econ* 126, 1485–1538. <https://doi.org/10.1093/qje/qjr029>
- Jayachandran, S., Pande, R., 2017. Why Are Indian Children So Short? The Role of Birth Order and Son Preference. *American Economic Review* 107, 2600–2629. <https://doi.org/10.1257/aer.20151282>
- Kalra, A., Priya, A., 2020. Birth Pangs Universal Maternity Entitlements in India. *Econ Polit Wkly* 55.
- Kapur, D., Nangia, P., 2015. Social Protection in India: A Welfare State Sans Public Goods? *India Review* 14, 73–90. <https://doi.org/10.1080/14736489.2015.1001275>
- Kekre, A., Mahajan, K., 2023a. Maternity support and child health: Unintended gendered effects. *J Comp Econ* 51, 880–898. <https://doi.org/10.1016/j.jce.2023.03.002>
- Kekre, A., Mahajan, K., 2023b. Maternity support and child health: Unintended gendered effects. *J Comp Econ* 51, 880–898. <https://doi.org/10.1016/j.jce.2023.03.002>
- Kishore, A., Chakrabarti, S., 2015a. Is more inclusive more effective? The ‘New Style’ public distribution system in India. *Food Policy* 55, 117–130. <https://doi.org/10.1016/j.foodpol.2015.06.006>
- Kishore, A., Chakrabarti, S., 2015b. Is more inclusive more effective? The ‘New Style’ public distribution system in India. *Food Policy* 55, 117–130. <https://doi.org/10.1016/j.foodpol.2015.06.006>
- Lachin, J.M., 2000. Statistical Considerations in the Intent-to-Treat Principle. *Control Clin Trials* 21, 167–189. [https://doi.org/10.1016/S0197-2456\(00\)00046-5](https://doi.org/10.1016/S0197-2456(00)00046-5)
- Li, Z., Kim, R., Vollmer, S., Subramanian, S. V., 2020. Factors Associated With Child Stunting, Wasting, and Underweight in 35 Low- and Middle-Income Countries. *JAMA Netw Open* 3, e203386. <https://doi.org/10.1001/jamanetworkopen.2020.3386>

- Lim, S.S., Dandona, L., Hoisington, J.A., James, S.L., Hogan, M.C., Gakidou, E., 2010a. India's Janani Suraksha Yojana, a conditional cash transfer programme to increase births in health facilities: an impact evaluation. *The Lancet* 375, 2009–2023. [https://doi.org/10.1016/S0140-6736\(10\)60744-1](https://doi.org/10.1016/S0140-6736(10)60744-1)
- Lim, S.S., Dandona, L., Hoisington, J.A., James, S.L., Hogan, M.C., Gakidou, E., 2010b. India's Janani Suraksha Yojana, a conditional cash transfer programme to increase births in health facilities: an impact evaluation. *The Lancet* 375, 2009–2023. [https://doi.org/10.1016/S0140-6736\(10\)60744-1](https://doi.org/10.1016/S0140-6736(10)60744-1)
- Manley, J., Alderman, H., Gentilini, U., 2022a. More evidence on cash transfers and child nutritional outcomes: a systematic review and meta-analysis. *BMJ Glob Health* 7, e008233. <https://doi.org/10.1136/bmjgh-2021-008233>
- Manley, J., Alderman, H., Gentilini, U., 2022b. More evidence on cash transfers and child nutritional outcomes: a systematic review and meta-analysis. *BMJ Glob Health* 7, e008233. <https://doi.org/10.1136/BMJGH-2021-008233>
- Manley, J., Alderman, H., Gentilini, U., 2022c. More evidence on cash transfers and child nutritional outcomes: a systematic review and meta-analysis. *BMJ Glob Health* 7, e008233. <https://doi.org/10.1136/bmjgh-2021-008233>
- Manley, J., Slavchevska, V., 2019. Are cash transfers the answer for child nutrition in sub-Saharan Africa? A literature review. *Development Policy Review* 37. <https://doi.org/10.1111/dpr.12346>
- Millán, T.M., Barham, T., Macours, K., Maluccio, J.A., Stampini, M., 2019. Long-Term Impacts of Conditional Cash Transfers: Review of the Evidence. *World Bank Res Obs* 34, 119–159. <https://doi.org/10.1093/wbro/lky005>
- Ministry of Women and Child Development, G. of I., 2021. Study on impact of PMMVY.
- Muralidharan, K., Prakash, N., 2017. Cycling to School: Increasing Secondary School Enrollment for Girls in India. *Am Econ J Appl Econ* 9, 321–350. <https://doi.org/10.1257/app.20160004>
- Olden, A., Møen, J., 2022a. The triple difference estimator. *Econom J* 25, 531–553. <https://doi.org/10.1093/ectj/utac010>
- Olden, A., Møen, J., 2022b. The triple difference estimator. *Econom J* 25, 531–553. <https://doi.org/10.1093/ectj/utac010>
- Owusu-Addo, E., Renzaho, A.M.N., Smith, B.J., 2018. The impact of cash transfers on social determinants of health and health inequalities in sub-Saharan Africa: A systematic review. *Health Policy Plan*. <https://doi.org/10.1093/heapol/czy020>
- Pande, R., Malhotra, A., 2006. Son Preference and Daughter Neglect in India: What Happens to Living Girls?
- Patwardhan, V., 2023a. The impact of the Mamata conditional cash transfer program on child nutrition in Odisha, India. *Health Econ* 32, 2127–2146. <https://doi.org/10.1002/hec.4720>

- Patwardhan, V., 2023b. The impact of the Mamata conditional cash transfer program on child nutrition in Odisha, India. *Health Econ* 32, 2127–2146. <https://doi.org/10.1002/hec.4720>
- Petrikova, I., 2022. The role of complementary feeding in India's high child malnutrition rates: findings from a comprehensive analysis of NFHS IV (2015–2016) data. *Food Secur* 14, 39–66. <https://doi.org/10.1007/s12571-021-01202-7>
- Raghunathan, K., Chakrabarti, S., Avula, R., Kim, S.S., 2017a. Can conditional cash transfers improve the uptake of nutrition interventions and household food security? Evidence from Odisha's Mamata scheme. *PLoS One* 12, e0188952. <https://doi.org/10.1371/journal.pone.0188952>
- Raghunathan, K., Chakrabarti, S., Avula, R., Kim, S.S., 2017b. Can conditional cash transfers improve the uptake of nutrition interventions and household food security? Evidence from Odisha's Mamata scheme. *PLoS One* 12, e0188952. <https://doi.org/10.1371/journal.pone.0188952>
- Richterman, A., Millien, C., Bair, E.F., Jerome, G., Suffrin, J.C.D., Behrman, J.R., Thirumurthy, H., 2023. The effects of cash transfers on adult and child mortality in low- and middle-income countries. *Nature*. <https://doi.org/10.1038/s41586-023-06116-2>
- Sabherwal, R., Sharma, D., Trivedi, N., 2019. Using direct benefit transfers to transfer benefits to women: a perspective from India. *Dev Pract* 29, 1001–1013. <https://doi.org/10.1080/09614524.2019.1653264>
- Sekher, T. V., Alagarajan, M., 2019. Concurrent Monitoring and Process Review of the Pradhan Mantri Matru Vandana Yojana (PMMVY) in Assam, Bihar and Maharashtra.
- Sen, G., Rajasekhar, D., 2012. Social Protection Policies, Experiences and Challenges. pp. 91–134. [https://doi.org/10.1057/9781137000767\\_4](https://doi.org/10.1057/9781137000767_4)
- Shadish, W.R., Cook, T.D., Campbell, D.T., 2002. *Experimental and Quasi-Experimental Designs for Research*. Houghton, Mifflin and Company.
- Sinha, D., Nehru, S., Matharu, S., Khanuja, J., Falcao, V.L., 2016. Realising Universal Maternity Entitlements: Lessons from Indira Gandhi Matritva Sahyog Yojana. *Econ Polit Wkly* 51, 49–55.
- Spears, D., Coffey, D., Behrman, J., 2019. Birth Order, Fertility, and Child Height in India and Africa. *SSRN Electronic Journal*. <https://doi.org/10.2139/ssrn.3390279>
- Vidmar, S.I., Cole, T.J., Pan, H., 2013. Standardizing Anthropometric Measures in Children and Adolescents with Functions for Egen: Update. *The Stata Journal: Promoting communications on statistics and Stata* 13, 366–378. <https://doi.org/10.1177/1536867X1301300211>
- von Haaren, P., Klöner, S., 2021. Lessons learned? Intended and unintended effects of India's second-generation maternal cash transfer scheme. *Health Econ* 30, 2468–2486. <https://doi.org/10.1002/hec.4390>

## Supplementary tables and figures

**Table S1. Landscape of India's perinatal conditional cash transfer programs, 1987-2021**

| Scheme                                              | Period         | Region                        | Amount (INR)                                     | Program Conditionality                                                                                   | Limits                                                                                                                            |
|-----------------------------------------------------|----------------|-------------------------------|--------------------------------------------------|----------------------------------------------------------------------------------------------------------|-----------------------------------------------------------------------------------------------------------------------------------|
| Muthu Lakshmi Reddy Maternal Benefit Scheme (MRMBS) | 1987 – present | Tamil Nadu – state            | 18,000 splits into many tranches                 | Antenatal care (ANC), Iron Folic Acid (IFA) supplements, deworming, vaccinations                         | 2 live births                                                                                                                     |
| National Maternity Benefit Scheme (NMBS)            | 1995 – 2005    | India – national              | ₹500                                             | N/A                                                                                                      | 2 live births<br>Woman should be from Below Poverty Line (BPL) cardholder family                                                  |
| Janani Suraksha Yojana (JSY)                        | 2005 – present | India – national              | 1,000 (rural) 1,400 (urban)                      | Institutional delivery                                                                                   | Institutional delivery in government hospital, BPL card holder/ Scheduled Tribes (ST) / Scheduled Castes (SC) in private hospital |
| Mamata scheme (O)                                   | 2011 – present | Odisha – state                | 5,000 splits into 4 tranches                     | Pregnancy registered, ANC, IFA, Nutrition counseling, Vitamin A supplements, vaccinations                | First 2 live births                                                                                                               |
| Indira Gandhi Matritva Suraksha Yojana (IGMSY)      | 2011 – 2016    | India – national <sup>1</sup> | 4,000 splits into 3 tranches                     | Pregnancy registered, ANC, IFA, Nutrition counseling, first dose of child vaccinations (DPT, BCG, Polio) | First 2 live births                                                                                                               |
| Pradhan Mantri Matru Vandana Yojana (PMMVY)         | 2017 – present | India – national              | 5,000 splits into 3 tranches <sup>2</sup>        | Pregnancy registered, ANC, first dose of child vaccinations (DPT, BCG, Polio)                            | First live birth <sup>3</sup>                                                                                                     |
| KCR Kit                                             | 2017 – present | Telangana – state             | 12,000 (Boy)<br>13,000 (Girl)<br>into 5 tranches | ANC, Institutional delivery, first and second dose of child vaccinations                                 | First 2 live births, treatment in government hospital                                                                             |
| Mamata scheme (G)                                   | 2018 – present | Goa - state                   | 10,000 in 1 tranche                              | Institutional delivery                                                                                   | Live birth of girl child                                                                                                          |

Note: Program details reflect the most recent identified for the scheme except in the case of PMMVY which is being evaluated in this paper. <sup>1</sup>Pilot program implemented in 52 out of the 640 districts in India. <sup>2</sup>At the time of writing under the new program guidelines released in March 2022, the number of instalments under the scheme has been reduced from 3 to 2 instalments. <sup>3</sup>As per the March 2022 guidelines, PMMVY benefits are being extended to a second child, but only if the second child is a girl. DPT stands for Diphtheria Pertussis & Tetanus vaccine and BCG stands for Bacillus Calmette Guerin single dose vaccine.

**Table S2. Instalment wise PMMVY layout**

| <b>Instalment</b>               | <b>Conditionality</b>                                                                                                                                                                                                                                       | <b>Documents Required</b>                                                                                                                                           | <b>Amount (INR)</b> |
|---------------------------------|-------------------------------------------------------------------------------------------------------------------------------------------------------------------------------------------------------------------------------------------------------------|---------------------------------------------------------------------------------------------------------------------------------------------------------------------|---------------------|
| First Instalment (Registration) | <ul style="list-style-type: none"> <li>• Register her pregnancy at any field functionary center along with required documents.</li> <li>• Register her pregnancy within 150 days</li> </ul>                                                                 | <ul style="list-style-type: none"> <li>• Application Form 1-A</li> <li>• MCP Card</li> <li>• Identity proof</li> <li>• Bank/Post Office Account Passbook</li> </ul> | 1,000               |
| Second Instalment               | <ul style="list-style-type: none"> <li>• At least one Ante Natal Care Check Up</li> <li>• Can be claimed post 180 days of pregnancy</li> </ul>                                                                                                              | <ul style="list-style-type: none"> <li>• Application Form 1-B</li> <li>• MCP Card</li> </ul>                                                                        | 2,000               |
| Third Instalment                | <ul style="list-style-type: none"> <li>• Childbirth is registered</li> <li>• Child has received first cycle of immunizations of BCG, OPV, DPT and Hepatitis B</li> <li>• Aadhaar is mandatory in all states except for J&amp;K, Assam, Meghalaya</li> </ul> | <ul style="list-style-type: none"> <li>• Application Form 1-C</li> <li>• MCP Card</li> <li>• Aadhaar ID</li> <li>• Birth Certificate</li> </ul>                     | 2,000               |

Source: (Sekher and Alagarajan, 2019); DPT stands for Diphtheria Pertussis & Tetanus vaccine, BCG stands for Bacillus Calmette Guerin single dose vaccine and OPV refers to Oral polio vaccine. MCP card stands for Mother child protection card, while Aadhaar refers to unique identification cards provided by the government.

**Figure S1. Sample restrictions and comparison groups used in the study**

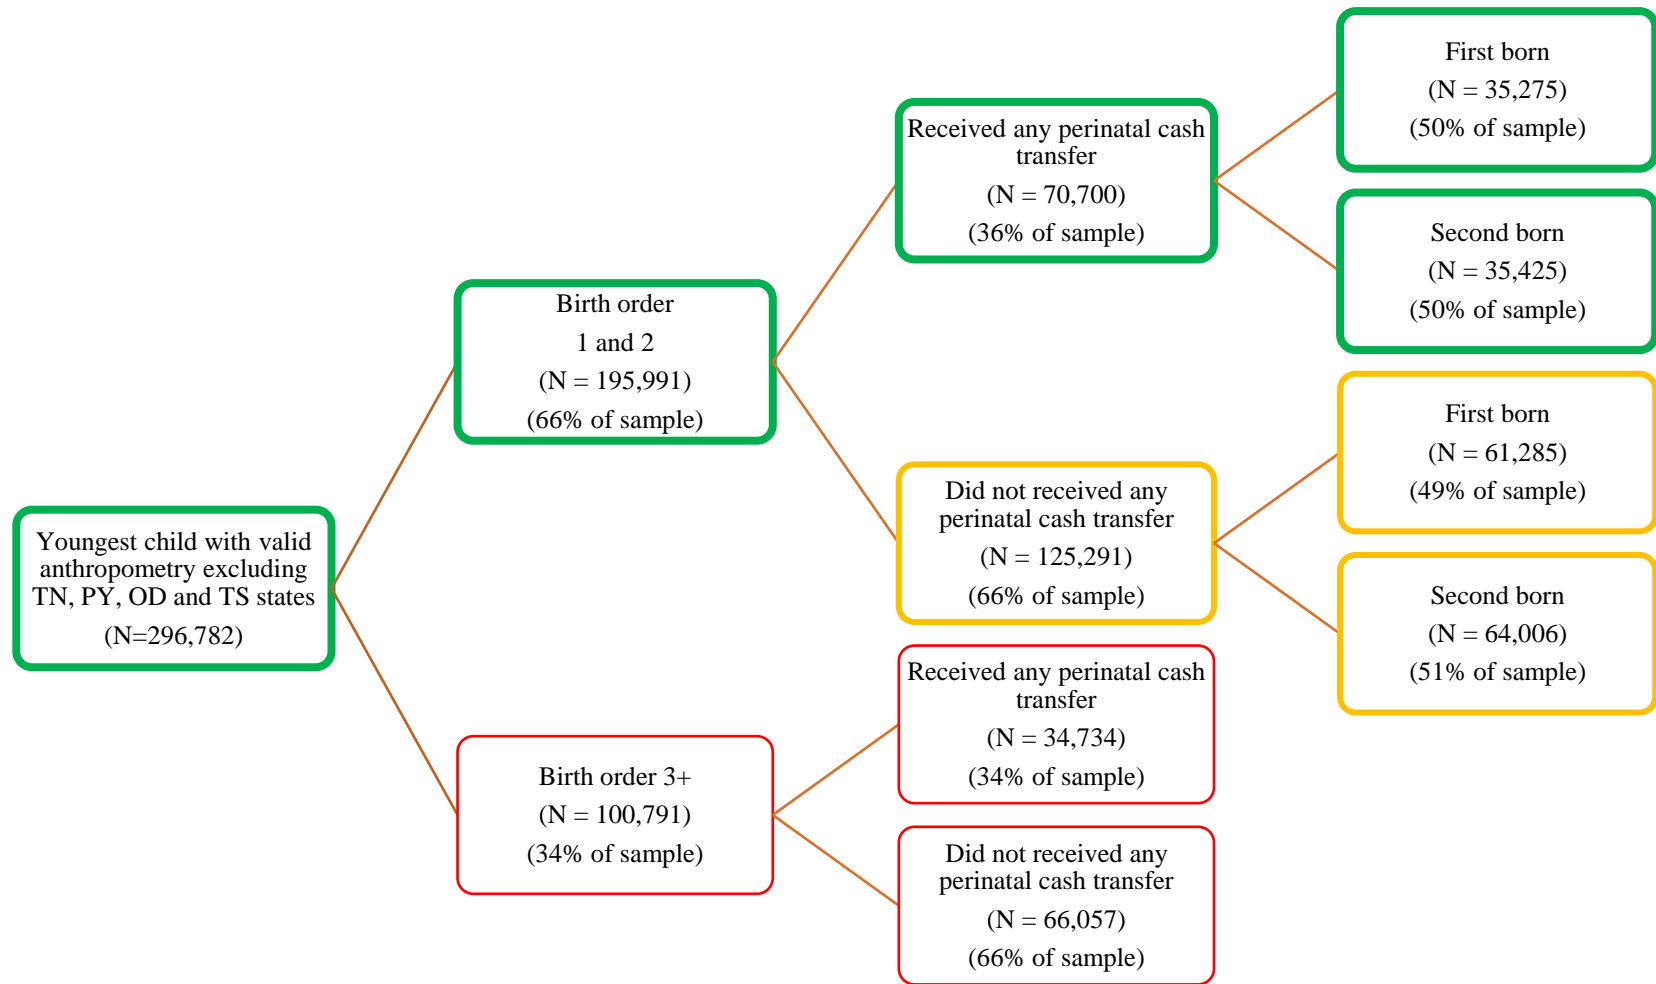



**Figure S2. Trends in outcomes by birth order, 2005-2021**

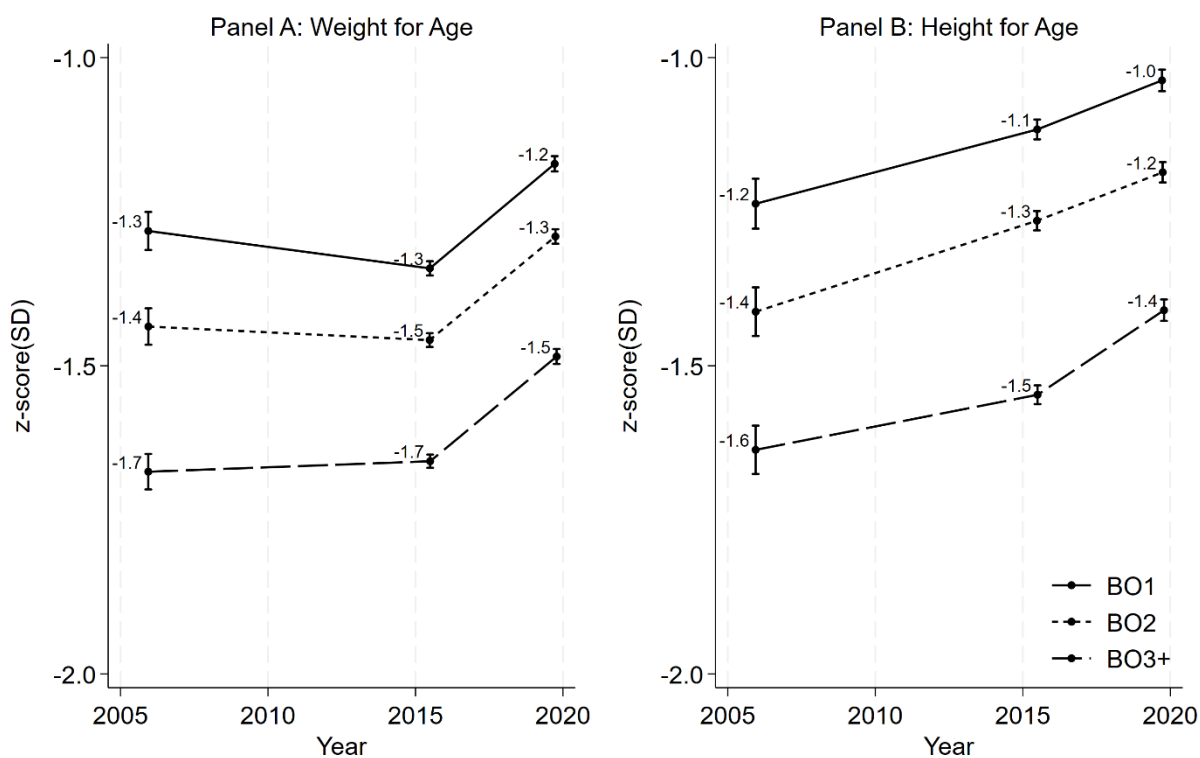

Notes: States with existing maternal benefits programs such as Tamil Nadu, Odisha, and Puducherry were dropped from the sample to isolate the PMMVY beneficiaries.

**Table S3. Triple differences estimate of changes in anthropometric outcomes comparing perinatal cash transfer beneficiaries to non-beneficiaries and firstborns to second born children between 2015 and 2021**

|                                                      | Weight for Age                           |                                          |                                         | Height for Age                           |                                          |                                         |
|------------------------------------------------------|------------------------------------------|------------------------------------------|-----------------------------------------|------------------------------------------|------------------------------------------|-----------------------------------------|
|                                                      | Unadjusted                               | Community fixed effects                  | Fully adjusted                          | Unadjusted                               | Community fixed effects                  | Fully adjusted                          |
| Non-CCT second-born children in 2016 ( $\beta_0$ )   | -1.507***<br>[-1.518, -1.497]            | -1.487***<br>[-1.496, -1.478]            | -6.068***<br>[-6.218, -5.919]           | -1.375***<br>[-1.389, -1.362]            | -1.405***<br>[-1.418, -1.393]            | -7.007***<br>[-7.218, -6.796]           |
| CCT ( $\beta_1$ )                                    | -0.099***<br>[-0.114, -0.083]            | -0.050***<br>[-0.066, -0.035]            | -0.024***<br>[-0.039, -0.009]           | -0.139***<br>[-0.160, -0.119]            | -0.104***<br>[-0.126, -0.082]            | -0.067***<br>[-0.089, -0.046]           |
| Firstborn ( $\beta_2$ )                              | 0.242***<br>[0.226, 0.258]               | 0.153***<br>[0.136, 0.169]               | 0.055***<br>[0.038, 0.072]              | 0.326***<br>[0.304, 0.348]               | 0.219***<br>[0.196, 0.242]               | 0.068***<br>[0.045, 0.092]              |
| Year (ref 2017) ( $\beta_3$ )                        | 0.222***<br>[0.204, 0.239]               | 0.183***<br>[0.162, 0.203]               | -0.109***<br>[-0.131, -0.086]           | 0.214***<br>[0.189, 0.239]               | 0.363***<br>[0.333, 0.393]               | -0.366***<br>[-0.399, -0.333]           |
| CCT * Firstborn ( $\beta_4$ )                        | -0.052***<br>[-0.078, -0.026]            | -0.052***<br>[-0.079, -0.026]            | -0.033**<br>[-0.059, -0.008]            | -0.075***<br>[-0.110, -0.039]            | -0.068***<br>[-0.105, -0.031]            | -0.037**<br>[-0.073, -0.001]            |
| CCT * Year ( $\beta_5$ )                             | -0.070**<br>[-0.097, -0.042]             | -0.044**<br>[-0.072, -0.016]             | -0.028**<br>[-0.056, 0.001]             | -0.017<br>[-0.056, 0.022]                | -0.044<br>[-0.085, 0.003]                | 0.003<br>[-0.037, 0.043]                |
| Firstborn * Year ( $\beta_6$ )                       | -0.073***<br>[-0.100, -0.045]            | -0.046***<br>[-0.074, -0.018]            | -0.014<br>[-0.042, 0.013]               | -0.115***<br>[-0.155, -0.075]            | -0.092***<br>[-0.133, -0.051]            | -0.028<br>[-0.068, -0.013]              |
| <b>CCT * Firstborn * Year (<math>\beta_7</math>)</b> | <b>0.107***</b><br><b>[0.062, 0.152]</b> | <b>0.081***</b><br><b>[0.035, 0.127]</b> | <b>0.054**</b><br><b>[0.009, 0.099]</b> | <b>0.108***</b><br><b>[0.043, 0.172]</b> | <b>0.122***</b><br><b>[0.055, 0.188]</b> | <b>0.077**</b><br><b>[0.013, 0.142]</b> |
| Fixed Effects                                        | No                                       | Yes                                      | Yes                                     | No                                       | Yes                                      | Yes                                     |
| Individual covariates                                | No                                       | No                                       | Yes                                     | No                                       | No                                       | Yes                                     |
| Household covariates                                 | No                                       | No                                       | Yes                                     | No                                       | No                                       | Yes                                     |
| <b>N</b>                                             | <b>295,988</b>                           | <b>295,988</b>                           | <b>294,588</b>                          | <b>296,782</b>                           | <b>296,782</b>                           | <b>295,374</b>                          |

Notes: Coefficients estimated using equation 1 (TD) are shown. Covariates include urban residence, health insurance, family size, Hindu, Muslim, Christian, scheduled caste, scheduled tribe, socio-economic status score, mother's height, mother's age, mother's education, child age, child sex, COVID-19 lockdown and community fixed effects. Standard errors are clustered at the community level. Confidence interval at 95% are reported in the parentheses.

\*\*\*, \*\*, \* show significance at 1%, 5% and 10%, respectively

**Figure S3. Pre-and-post intervention trends in child nutrition outcomes by cash transfer, birth order across birth cohorts**

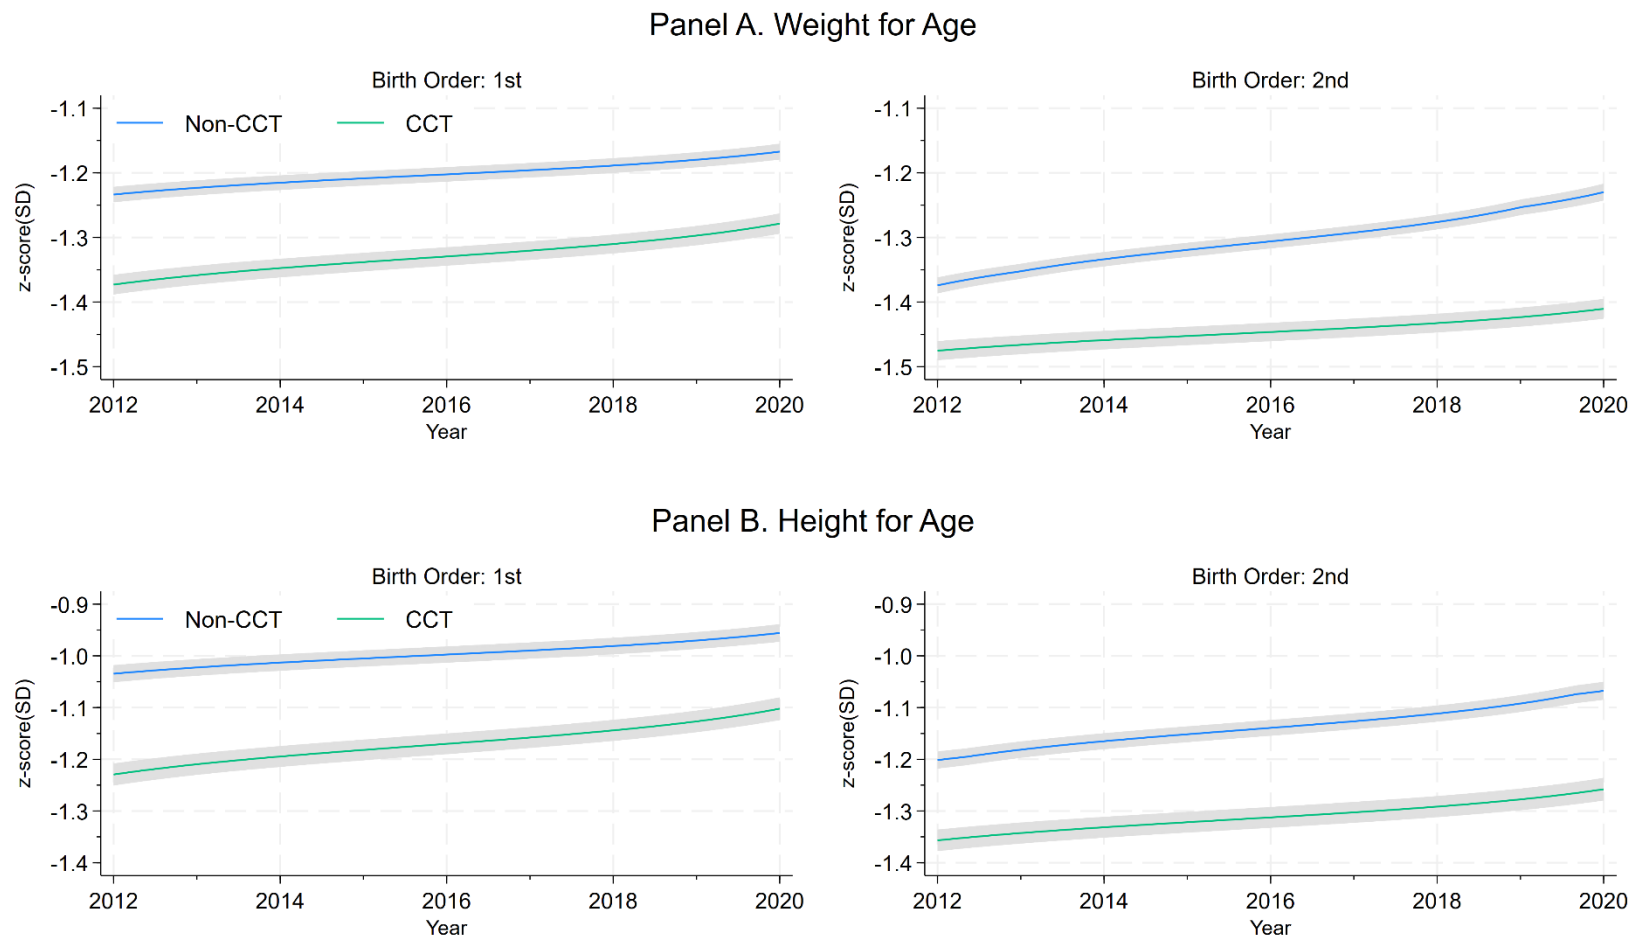

Notes: Plots represent the pooled data from NFHS 4 and 5. Weight for age and Height for age z-scores calculated between birth year 2012 and 2020 for birth order 1 (BO1) and birth order 2 (BO2), along with those who received conditional cash transfer (CCT) and those who didn't (non-CCT). For parametric test of parallel trends see Table S4 in Supplementary material.

**Table S4. Test of parallel trends in preintervention period for the triple difference model (2010-2016)**

|                | <b>Parallel trends assumption not rejected</b> | <b>Coefficient of triple interaction term in placebo difference-in-difference regression</b> | <b>p-value</b> |
|----------------|------------------------------------------------|----------------------------------------------------------------------------------------------|----------------|
| Weight-for-age | Yes                                            | -0.05                                                                                        | 0.10           |
| Height-for-age | Yes                                            | -0.07                                                                                        | 0.12           |

Notes: This test uses equation one and uses data from NFHS4 (2015-2016). Standard errors are clustered at the community level.

**Table S5. Randomization inference p-values on the triple differences estimate of changes in anthropometric outcomes**

|                         | Unadjusted | Community fixed effect | Fully adjusted |
|-------------------------|------------|------------------------|----------------|
| Panel A: Weight for Age |            |                        |                |
| Unadjusted p-value      | 0.000      | 0.006                  | 0.046          |
| RI adjusted p-value     | 0.000      | 0.006                  | 0.043          |
| Panel B: Height for Age |            |                        |                |
| Unadjusted p-value      | 0.052      | 0.005                  | 0.043          |
| RI adjusted p-value     | 0.051      | 0.003                  | 0.036          |

Note: Unadjusted p-values are reported for the triple difference estimator shown in Table S3. The RI adjusted p-values are estimated using randomization inference procedure (Heß, 2017) using 1,000 random draws.

**Table S6. Categorization of states based on the PMMVY implementation department**

| <b>Health Department</b> | <b>WCD Department</b> | <b>Social welfare and Justice (SWJ)</b> |
|--------------------------|-----------------------|-----------------------------------------|
| Andhra Pradesh           | Arunachal Pradesh     | Andaman & Nicobar                       |
| Chandigarh               | Chhattisgarh          | Assam                                   |
| Dadra & Nagar Haveli     | Delhi                 | Bihar                                   |
| Daman & Diu              | Goa                   | Himachal Pradesh                        |
| Meghalaya                | Gujarat               | Jammu & Kashmir (incl. Ladakh)          |
| Telangana                | Haryana               | Kerala                                  |
| Uttar Pradesh            | Jharkhand             | Manipur                                 |
| West Bengal##            | Karnataka             | Mizoram                                 |
|                          | Lakshadweep           | Nagaland                                |
|                          | Madhya Pradesh        | Sikkim                                  |
|                          | Maharashtra           | Tripura                                 |
|                          | Punjab                |                                         |
|                          | Rajasthan             |                                         |
|                          | Uttarakhand           |                                         |

Note: ## West Bengal didn't implement the program initially. But government notifications suggests that it is being implemented using Health department.

**Table S7. State wise coverage and spending of PMMVY**

| States/Union Territories  | Estimated % of first live born children PMMVY potentially covered |           |           |           | Estimated per capita spending on target population (In Indian rupees) |             |             |             |
|---------------------------|-------------------------------------------------------------------|-----------|-----------|-----------|-----------------------------------------------------------------------|-------------|-------------|-------------|
|                           | 2017-18                                                           | 2018-19   | 2019-20   | 2020-21   | 2017-18                                                               | 2018-19     | 2019-20     | 2020-21     |
| Jammu & Kashmir           | 29                                                                | 42        | 40        | 47        | 96                                                                    | 1925        | 2004        | 1383        |
| Himachal Pradesh          | 90                                                                | 100       | 71        | 78        | 946                                                                   | 5845        | 4384        | 3720        |
| Punjab                    | 29                                                                | 47        | 40        | 42        | 336                                                                   | 2381        | 2006        | 1659        |
| Chandigarh                | 32                                                                | 48        | 37        | 61        | 732                                                                   | 2043        | 1924        | 2733        |
| Uttarakhand               | 44                                                                | 77        | 71        | 83        | 661                                                                   | 3014        | 3676        | 3875        |
| Haryana                   | 40                                                                | 75        | 44        | 44        | 548                                                                   | 3476        | 2511        | 1224        |
| Delhi                     | 22                                                                | 40        | 31        | 48        | 256                                                                   | 1632        | 1640        | 1432        |
| Rajasthan                 | 19                                                                | 100       | 43        | 34        | 105                                                                   | 3370        | 2297        | 1586        |
| Uttar Pradesh             | 20                                                                | 67        | 67        | 47        | 285                                                                   | 2337        | 3050        | 1866        |
| Bihar                     | 19                                                                | 35        | 100       | 100       | 83                                                                    | 891         | 3982        | 6047        |
| Sikkim                    | 37                                                                | 78        | 45        | 55        | 102                                                                   | 3377        | 3215        | 1761        |
| Arunachal Pradesh         | 9                                                                 | 67        | 65        | 68        | 10                                                                    | 2076        | 2985        | 2754        |
| Nagaland                  | 2                                                                 | 32        | 100       | 75        | 0                                                                     | 1006        | 6613        | 3127        |
| Manipur                   | 23                                                                | 37        | 100       | 89        | 324                                                                   | 1361        | 5016        | 3940        |
| Mizoram                   | 41                                                                | 100       | 42        | 56        | 87                                                                    | 4813        | 3306        | 2532        |
| Tripura                   | 22                                                                | 69        | 81        | 64        | 36                                                                    | 1797        | 4515        | 2259        |
| Meghalaya                 | 0                                                                 | 11        | 40        | 26        | 0                                                                     | 324         | 1613        | 944         |
| Assam                     | 9                                                                 | 45        | 97        | 53        | 34                                                                    | 1183        | 4756        | 2037        |
| West Bengal               | 9                                                                 | 41        | 60        | 33        | 17                                                                    | 1446        | 2267        | 0           |
| Jharkhand                 | 33                                                                | 45        | 49        | 38        | 213                                                                   | 1825        | 2289        | 1313        |
| Odisha                    | 0                                                                 | 0         | 0         | 0         | 0                                                                     | 0           | 0           | 0           |
| Chhattisgarh              | 48                                                                | 73        | 67        | 55        | 341                                                                   | 2456        | 3638        | 2449        |
| Madhya Pradesh            | 80                                                                | 100       | 88        | 96        | 587                                                                   | 5753        | 4876        | 4710        |
| Gujarat                   | 18                                                                | 36        | 45        | 12        | 311                                                                   | 1819        | 2180        | 624         |
| Dadra & Nagar Haveli      | 25                                                                | 70        | 45        | 53        | 122                                                                   | 2214        | 2572        | 2095        |
| Maharashtra               | 24                                                                | 54        | 70        | 47        | 398                                                                   | 2148        | 3266        | 2158        |
| Andhra Pradesh            | 63                                                                | 85        | 61        | 54        | 876                                                                   | 4102        | 3942        | 1879        |
| Karnataka                 | 29                                                                | 80        | 69        | 100       | 451                                                                   | 2939        | 3851        | 3356        |
| Goa                       | 27                                                                | 49        | 32        | 40        | 502                                                                   | 2284        | 1573        | 1760        |
| Lakshadweep               | 49                                                                | 58        | 55        | 55        | 0                                                                     | 2427        | 1454        | 2399        |
| Kerala                    | 52                                                                | 78        | 79        | 88        | 698                                                                   | 3379        | 4291        | 3201        |
| Tamil Nadu                | 0                                                                 | 42        | 75        | 77        | 0                                                                     | 759         | 2580        | 2296        |
| Puducherry                | 9                                                                 | 31        | 26        | 34        | 57                                                                    | 1266        | 1519        | 1210        |
| Andaman & Nicobar Islands | 83                                                                | 62        | 43        | 55        | 1461                                                                  | 3542        | 3320        | 2887        |
| Telangana                 | 0                                                                 | 0         | 0         | 0         | 0                                                                     | 0           | 0           | 0           |
| <b>India</b>              | <b>26</b>                                                         | <b>59</b> | <b>63</b> | <b>54</b> | <b>283</b>                                                            | <b>2254</b> | <b>2953</b> | <b>2070</b> |

Note: Author's own estimation using the data from the Health Management Information System, the Census Sample Registration System, and responses filed by the Ministry of Women and Child Development in the Lok Sabha.
